# Supplementary material
Source: PubMed Central journal article supplement (PMC5533216)
Supplement: NIHMS73080-supplement-Supplement.pdf [file NIHMS73080-supplement-Supplement.pdf]

## Supplementary Appendix

This appendix has been provided by the authors to give readers additional information about their work.

Supplement to: James ND, de Bono JS, Spears MR, et al. Abiraterone for prostate cancer not previously treated with hormone therapy. *N Engl J Med*. DOI: 10.1056/NEJMoa1702900

# Abiraterone acetate with prednisolone for hormone-naïve prostate cancer: First survival results from the STAMPEDE randomized controlled trial (MRC PR08, CRUK/06/019)

== SUPPLEMENTARY MATERIALS ==

## Contents

|                                                                                                                         |           |
|-------------------------------------------------------------------------------------------------------------------------|-----------|
| <b>COLLABORATORS .....</b>                                                                                              | <b>2</b>  |
| <b>AUTHOR CONTRIBUTIONS .....</b>                                                                                       | <b>6</b>  |
| <b>SUPPLEMENTARY FIGURES .....</b>                                                                                      | <b>7</b>  |
| Figure S1: Enrolment and Randomization of Patients for the Analysis of Overall Survival .....                           | 7         |
| Figure S2: Time on abiraterone acetate with prednisolone .....                                                          | 8         |
| Figure S3: Time to first Progression-Free Survival Event .....                                                          | 9         |
| Figure S4A: Time to first Symptomatic Skeletal Event .....                                                              | 10        |
| Figure S4B: Time to first Symptomatic Skeletal Event by baseline metastasis .....                                       | 11        |
| <b>SUPPLEMENTARY TABLES .....</b>                                                                                       | <b>12</b> |
| Table S1: Full Characteristics of All Patients in the Comparison .....                                                  | 12        |
| Table S2: Study-Drug Exposure in the Abiraterone Acetate with Prednisolone (AAP) Arm .....                              | 15        |
| Table S3: Summary of relapse therapies .....                                                                            | 16        |
| Table S4: Worst AE grade within each category ever (by treatment arm) – Part 1 .....                                    | 17        |
| Table S5: Worst AE grade within each category ever (by treatment arm) – Part 2 .....                                    | 18        |
| Table S6: Worst AE grade within each category ever (by treatment arm) – Part 3 .....                                    | 19        |
| Table S7: Worst AE grade within each category ever (by treatment arm) – Part 4 .....                                    | 20        |
| Table S8: Worst blood/bone marrow grade within each category ever (by treatment arm) .....                              | 21        |
| Table S9: Worst cardiac disorder grade within each category ever (by treatment arm) – Part 1 .....                      | 22        |
| Table S10: Worst cardiac disorder grade within each category ever (by treatment arm) – Part 2 .....                     | 23        |
| Table S11: Worst hypertension toxicity reported ever, split by hypertensive status at baseline (by treatment arm) ..... | 24        |
| Table S12: Worst gastrointestinal disorder grade within each category ever (by treatment arm) – Part 1 .....            | 25        |
| Table S13: Worst ever gastrointestinal disorder grade (by treatment arm) – Part 2 .....                                 | 26        |
| Table S14: Worst ever gastrointestinal disorder grade (by treatment arm) – Part 3 .....                                 | 27        |
| Table S15: Worst endocrine disorder grade within each category ever (by treatment arm) .....                            | 28        |
| Table S16: Worst general disorder grade within each category ever (by treatment arm) – Part 1 .....                     | 29        |
| Table S17: Worst general disorder grade within each category ever (by treatment arm) – Part 2 .....                     | 30        |
| Table S18: Worst hepatic disorder grade within each category ever (by treatment arm) – Part 1 .....                     | 31        |
| Table S19: Worst hepatic disorder grade within each category ever (by treatment arm) – Part 2 .....                     | 32        |
| Table S20: Worst lab abnormalities grade within each category ever (by treatment arm) .....                             | 33        |
| Table S21: Worst metabolic & nutritional grade within each category ever (by treatment arm) .....                       | 34        |
| Table S22: Worst musculoskeletal disorder grade within each category ever (by treatment arm) – Part 1 .....             | 35        |
| Table S23: Worst musculoskeletal disorder grade within each category ever (by treatment arm) – Part 2 .....             | 36        |
| Table S24: Worst nervous system grade within each category ever (by treatment arm) .....                                | 37        |
| Table S25: Worst ocular disorder grade within each category ever (by treatment arm) .....                               | 38        |
| Table S26: Worst psychiatric disorder grade within each category ever (by treatment arm) .....                          | 39        |
| Table S27: Worst renal disorder grade within each category ever (by treatment arm) – Part 1 .....                       | 40        |
| Table S28: Worst renal disorder grade within each category ever (by treatment arm) – Part 2 .....                       | 41        |
| Table S29: Worst respiratory disorder grade within each category ever (by treatment arm) – Part 1 .....                 | 42        |
| Table S30: Worst respiratory disorder grade within each category ever (by treatment arm) – Part 2 .....                 | 43        |
| Table S31: Worst skin disorder grade within each category ever (by treatment arm) .....                                 | 44        |
| Table S32: Worst Adverse Event Grade Reported Over Entire Time on Trial, by stratified age at randomisation .....       | 45        |

## COLLABORATORS

### Independent Data Monitoring Committee:

*Current:* John Yarnold (chair), Doug Altman, Ronald de Wit, Bertrand Tombal

*Previous:* Reg Hall, , Chris Williams

### Trial Steering Committee

*Current:* Jonathan Ledermann, Jan Erik Dember, David Kirk, Jim Paul

*Previous:* John Fitzpatrick,

## PARTICIPATING SITE (N1|N2|N3: site PI; other investigators)

### Key

|    |                                        |
|----|----------------------------------------|
| N1 | Recruited and in comparison            |
| N2 | Recruitment while comparison recruited |
| N3 | Recruited to data freeze               |
| PI | Principle Investigator                 |

### United Kingdom

- **Aberystwyth, Bronglais General Hospital** (4|4|4: Porfiri; Durrani)
- **Ashford William Harvey Hospital** (1|4|19: Thomas; Mithal)
- **Aylesbury, Stoke Mandeville Hospital** (5|5|14: Sabharwal; Camilleri)
- **Ayr Hospital** (10|20|54: Glen; Ansari)
- **Barnet General Hospital** (11|13|25: McGovern; Eichholz)
- **Basingstoke & N Hampshire Hospital** (3|5|21: Shaffer)
- **Bath, Royal united Hospital** (18|26|70: Frim; Beresford)
- **Belfast City** (48|72|191: O'Sullivan; Mitchell, Stewart, Shum)
- **Birmingham, City Hospital** (10|13|26: Sivoglo; Ford)
- **Birmingham, Good Hope Hospital** (5|10|18: Ford)
- **Birmingham, Heartlands Hospital** (8|14|38: Zarkar)
- **Birmingham, QE** (33|48|180: James; Porfiri, Ford)
- **Blackburn East Lancashire Trust** (34|48|180: Parikh; Charnley)
- **Bolton, Royal Bolton Hospital** (6|8|30: Elliott)
- **Boston, Pilgrim Hospital** (8|8|38: Sreenivasan; Panades)
- **Bournemouth, Royal Bournemouth Hospital** (22|28|100: Brock)
- **Bradford Royal Infirmary** (6|11|36: Brown)
- **Brighton, Royal Sussex County Hospital** (21|31|92: Robinson; Robinson, Bloomfield)
- **Bristol H & O Centre** (22|32|106: Bahl; Herbert, Masson)
- **Burton, Queen's Hospital** (21|28|108: Smith-Howell; Chetiyawardana, Pattu)
- **Bury St Edmunds, West Suffolk Hospital** (3|7|21: Woodward)
- **Cardiff, Velindre** (64|99|341: Lester; Staffurth, Barber, Kumar, Palaniappan, Button, Tanguay)
- **Chelmsford, Broomfield Hospital** (21|28|88: Hamid; Panwar, Leone)
- **Cheltenham General Hospital** (5|6|54: Bowen)
- **Chester, Countess of Chester Hospital** (31|41|79: Ibrahim)
- **Coventry & Warwickshire, University Hospital** (11|15|40: Worliding; Stockdale)
- **Crewe, Leighton Hospital** (18|20|54: Wylie)
- **Cumbria, Cumberland Infirmary** (4|6|18: Kumar)
- **Darlington Memorial Hospital** (9|18|49: Kagzi; Hardman, Peedell)
- **Derby, Royal Derby Hospital** (35|44|130: Chakraborti; Pattu)

- **Devon, North Devon District Hospital** (5|15|33: Sheehan)
- **Doncaster Royal Infirmary** (5|10|35: Bowen; Ferguson)
- **Dorset County Hospital** (9|13|30: Crellin; Afzal, Andrews)
- **Dudley, Russells Hall Hospital** (17|22|81: Keng-Koh; Ramachandra)
- **Durham University Hospital** (2|3|17: Heath; McMenemin)
- **Eastbourne District General Hospital** (16|23|63: McKinna)
- **Edinburgh, Western General** (16|28|112: McLaren)
- **Essex County Hospital** (18|22|58: Muthukumar; Sizer, Kumar)
- **Exeter, RD&E** (29|45|189: Sheehan; Srinivasan)
- **Gillingham, Medway Hospital** (8|11|29: Kumar; Taylor)
- **Glasgow, BOC** (62|95|323: Graham; Venugopal, Wallace, Jones, Lamb, Glen, Russell)
- **Guildford, Royal Surrey County Hospital** (26|44|132: Laing; Khaksar, Wood, Money-Kyrle)
- **Harlow, Princess Alexandra Hospital** (7|10|54: Gupta; Melcher, Melcher)
- **Hereford County Hospital** (12|19|71: Grant; Cook)
- **Huddersfield Royal Infirmary** (21|29|105: Hofmann)
- **Hull, Castle Hill Hospital** (20|33|119: Simms; Hetherington)
- **Inverness, Raigmore Hospital** (28|41|88: McPhail; MacGregor)
- **Ipswich Hospital** (21|32|103: Brierly; Venkitaraman, Scrase)
- **Keighley, Airedale Hospital** (15|22|52: Brown; Crawford)
- **Kent and Canterbury Hospital** (27|35|79: Thomas; Raman, Mithal, Malde)
- **Kent, QE Q Mother Hospital** (5|9|27: Thomas; Raman)
- **Kidderminster General Hospital** (6|10|40: Capaldi; Churn)
- **Larbert, Forth Valley Royal Hospital** (8|13|36: Sidek)
- **Leeds, St James University Hospital** (17|24|94: Cross; Loughrey, Bottomley, Prescott)
- **Lincoln County Hospital** (18|21|50: Sreenivasan; Ballesteros-Quintail, Panades, Baria)
- **Liverpool, Royal Liv University Hospital** (30|40|88: Malik; Robson, Eswar)
- **Liverpool, UH Aintree** (8|9|26: Robson)
- **London, Charing Cross Hospital** (11|13|38: Falconer; Mangar)
- **London, Guy's Hospital** (44|66|161: Chowdhury)
- **London, Hammersmith Hospital** (2|4|4: Falconer; Mangar)
- **London, N Middlesex Hospital** (6|10|24: Gupta; Newby, Thompson)
- **London, Royal Free Hospital** (10|15|44: Vilarino-Varela; Pigott)
- **London, St Georges Hospital** (7|10|35: Pickering)
- **London, St Mary's Hospital** (2|2|8: Falconer; Stewart)
- **London, UCH** (13|17|46: McGovern)
- **Maidstone, Kent Oncology Centre** (17|26|114: Beesley)
- **Manchester Christie Hospital** (27|38|167: Clarke; Elliot, Livsey, Choudhury, Wylie)
- **Manchester Hope Hospital** (12|17|59: Clarke; Elliot)
- **Manchester, Royal Oldham Hospital** (17|25|54: Conroy; Livsey, Choudhury)
- **Manchester, Withington Hospital** (1|2|7: Sangar)
- **Middlesbrough, James Cook UH** (20|31|103: Peedell; Van der Voet, Hardman, Shakespeare)
- **Newcastle, Freeman Hospital** (16|17|92: Azzabi; McMenemin, Frew)
- **North Staffordshire UH** (33|43|80: Adab)
- **Northwood, Mount Vernon Hospital** (22|36|126: Hoskin; Anyamene, Ostler, Alonzi)
- **Nottingham University Hospitals (City Campus)** (20|31|141: Sundar; Mills)
- **Nuneaton, George Eliot Hospital** (7|7|14: Khan; Chan)
- **Oxford, Churchill Hospital** (36|48|165: Protheroe; Cole, Sabharwal, Sugden)
- **Poole Hospital** (18|23|62: Davies)
- **Portsmouth, Q Alexandra Hospital** (49|72|173: Gale)
- **Preston, Royal Preston Hospital** (59|74|221: Birtle; Parikh, Wise)

- **Reading, Royal Berkshire Hospital** (8|11|42: Rogers; O'Donnell, Brown, Brown)
- **Redditch, Alexandra Hospital** (5|6|15: Capaldi; Hamilton)
- **Romford, Queen's Hospital** (23|32|127: Gibbs; Subramaniam)
- **Scarborough General Hospital** (28|35|82: Hingorani)
- **Sheffield, Weston Park** (19|28|142: Ferguson)
- **Shrewsbury, Royal Shrewsbury Hospital** (36|47|192: Srihari)
- **Somerset, Weston General Hospital** (6|9|18: Hilman)
- **Southampton General Hospital** (18|24|75: Jones; Heath, Wheeler, Crabb)
- **Southend University Hospital** (23|31|114: Tsang; Ahmed, Chan)
- **Southport and Formby District GH** (15|18|46: Bhalla; Sivapalasantharam, Sivapalasantharam)
- **St Leonards-on-Sea, Conquest Hospital** (11|20|42: McKinna; Beesley, Lees)
- **Stevenage, Lister Hospital** (10|18|35: Hughes)
- **Stockport, Stepping Hill Hospital** (23|32|106: Logue; Coyle, Coyle)
- **Stockton-on-Tees, UH North Tees** (3|5|28: Leaning; Shakespeare)
- **Sunderland Royal Hospital** (1|2|45: Azzabi)
- **Sutton-in-Ashford, King's Mill Hospital** (15|22|64: Saunders)
- **Sutton-London, RMH** (29|42|162: Dearnaley; Parker, Selvadurai)
- **Swansea, Singleton** (36|57|188: Wagstaff; Phan, Phan)
- **Swindon, Great Western Hospital** (15|22|52: Khan; Cole)
- **Taunton, Musgrove Park Hospital** (30|45|137: Gray; Graham, Varughese, Plataniotis)
- **Torbay District General Hospital** (28|38|135: Lydon; Srinivasan)
- **Tyne & Wear, S Tyneside District Hospital** (1|2|6: Azzabi)
- **Warrington Hospital** (24|33|111: Syndikus; Tolan)
- **Warwick Hospital** (5|5|17: Chan; Stockdale)
- **Wigan, Royal Albert Edward Infirmary** (6|12|37: Tran)
- **Wirral, Clatterbridge Centre for Oncology** (39|55|128: Tolan; Syndikus, Ibrahim, Montazeri, Littler)
- **Wolverhampton, New Cross Hospital** (3|3|53: Gray; Sayers)
- **Woolwich, QE Hospital** (8|11|18: Hughes)
- **Worcestershire Royal Hospital** (8|12|57: Capaldi; Bowen)
- **Worthing Hospital** (20|28|90: Nikapota)
- **Wycombe Hospital** (6|10|52: Sabharwal; Protheroe, Pwint)

#### Switzerland

- **Basel Universitatsspital** (1|1|5: Rentsch)
- **Berne University Hospital (Inselspital)** (1|1|5: Thalmann)
- **Chur Kantonsspital Graubunden** (5|9|31: Strebel; Cathomas)
- **Kantonsspital St Gallen** (2|2|10: Engeler)
- **Lausanne, Centre Hospital Univ Vaudois** (4|5|7: Berthold; Jichlinski)

Plus all of the local team staff at all of these sites.

## **TRIALS UNIT STAFF (involved from 2011 onwards)**

### **MRC Clinical Trials Unit At UCL**

- **Statisticians** -- Matthew Sydes, Max Parmar, Melissa Spears, Chris Brawley, Gordana Jovic, Andrew Embleton
- **Project and Trial Managers** – Claire Amos, Nafisah Atako; Charlene Green, Francesca Schiavone, Alanna Brown, Orla Prendiville, Karen Sanders, Katie Ward, Mazna Anjum, Anna Herasimtschuk, Claire Murphy, Jenny Petrie
- **Data Managers** -- Sara Peres, Hannah Gardner, Dominic Hague, Katie Ward, Peter Vaughan, Eva Ades, Hannah Babiker, Carly Au, Zohrah Khan, Danielle Johnson, Nargis Begum, Tasmin Philips, Lina Bergstrom, Saba Khan, Jenna Grabey
- **Data Scientists and Programmers** –Lindsey Masters, Will Cragg, Dominic Hague; Nadine Van Looy, Zaheer Islam, Sajad Khan
- **Clinicians** – Clare Gilson, Alastair Ritchie.
- **Trial Assistants** – Leigh Dobson, Alexandra Wadia, Nat Thorogood, Stephanie Wetton, Amy Fiddament, Shanaz, Sohail, Tracey Fisher

### **Swiss Group for Cancer Clinical Research**

- **Project and Trial Managers** – Corinne Schar, Estelle Cassolly

## AUTHOR CONTRIBUTIONS

| Name                  | Initial | Conceived the original MAMS idea | Designed this comparison | Was a grant holder | Collected or collated data | Performed or oversaw statistical analyses | Interpreted data | Wrote critical sections of the report | Reviewed and agreed the report |
|-----------------------|---------|----------------------------------|--------------------------|--------------------|----------------------------|-------------------------------------------|------------------|---------------------------------------|--------------------------------|
| James, Nick           | NDJ     |                                  | x                        | x                  | x                          |                                           | x                | x                                     | x                              |
| de Bono, Johann       | JSdB    |                                  | x                        | x                  | x                          |                                           | x                | x                                     | x                              |
| Spears, Melissa       | MRSp    |                                  |                          |                    | x                          | x                                         | x                | x                                     | x                              |
| Clarke, Noel          | NWC     |                                  | x                        | x                  | x                          |                                           | x                | x                                     | x                              |
| Mason, Malcolm        | MDM     |                                  | x                        | x                  | x                          |                                           | x                | x                                     | x                              |
| Dearnaley, David      | DPD     |                                  | x                        |                    | x                          |                                           | x                | x                                     | x                              |
| Ritchie, Alastair W S | AWSR    |                                  | x                        |                    | x                          |                                           | x                | x                                     | x                              |
| Amos, Claire          | CLA     |                                  | x                        |                    | x                          |                                           | x                |                                       | x                              |
| Gilson, Clare         | CEG     |                                  |                          |                    | x                          |                                           | x                |                                       | x                              |
| Jones, Rob            | RJJ     |                                  |                          |                    | x                          |                                           | x                |                                       | x                              |
| Matheson, David       | DM      |                                  |                          |                    | x                          |                                           | x                |                                       | x                              |
| Millman, Robin        | RMM     |                                  |                          |                    | x                          |                                           | x                |                                       | x                              |
| Attard, Gerhardt      | GA      |                                  |                          |                    | x                          |                                           | x                |                                       | x                              |
| Chowdhury, Simon      | SC      |                                  |                          |                    | x                          |                                           | x                |                                       | x                              |
| Cross, Bill           | WRC     |                                  |                          |                    | x                          |                                           | x                |                                       | x                              |
| Gillessen, Silke      | SG      |                                  |                          |                    | x                          |                                           | x                |                                       | x                              |
| Parker, Chris         | CCP     |                                  |                          |                    | x                          |                                           | x                |                                       | x                              |
| Russell, Martin       | JMR     |                                  | x                        |                    | x                          |                                           | x                |                                       | x                              |
| Berthold, Dominik     | DB      |                                  |                          |                    | x                          |                                           | x                |                                       | x                              |
| Brawley, Chris        | CB      |                                  |                          |                    | x                          | x                                         | x                | x                                     | x                              |
| Adab, Fawzi           | FA      |                                  |                          |                    | x                          |                                           | x                |                                       | x                              |
| Aung, San             | SA      |                                  |                          |                    | x                          |                                           | x                |                                       | x                              |
| Birtle, Alison        | AB      |                                  |                          |                    | x                          |                                           | x                |                                       | x                              |
| Bowen, Jo             | JB      |                                  |                          |                    | x                          |                                           | x                |                                       | x                              |
| Brock, Sue            | SB      |                                  |                          |                    | x                          |                                           | x                |                                       | x                              |
| Chakraborti, Prabir   | PC      |                                  |                          |                    | x                          |                                           | x                |                                       | x                              |
| Ferguson, Catherine   | CF      |                                  |                          |                    | x                          |                                           | x                |                                       | x                              |
| Gale, Joanna          | JG      |                                  |                          |                    | x                          |                                           | x                |                                       | x                              |
| Gray, Emma            | EG      |                                  |                          |                    | x                          |                                           | x                |                                       | x                              |
| Hingorani, Mohan      | MH      |                                  |                          |                    | x                          |                                           | x                |                                       | x                              |
| Hoskin, Peter         | PH      |                                  |                          |                    | x                          |                                           | x                |                                       | x                              |
| Lester, Jason         | JL      |                                  |                          |                    | x                          |                                           | x                |                                       | x                              |
| Malik, Zafar          | ZM      |                                  |                          |                    | x                          |                                           | x                |                                       | x                              |
| McKinna, Fiona        | FM      |                                  |                          |                    | x                          |                                           | x                |                                       | x                              |
| McPhail, Neil         | NM      |                                  |                          |                    | x                          |                                           | x                |                                       | x                              |
| Money-Kyrle, Julian   | JM      |                                  |                          |                    | x                          |                                           | x                |                                       | x                              |
| O'Sullivan, Joe       | JO      |                                  |                          |                    | x                          |                                           | x                |                                       | x                              |
| Parik, Omi            | OP      |                                  |                          |                    | x                          |                                           | x                |                                       | x                              |
| Protheroe, Andrew     | AP      |                                  |                          |                    | x                          |                                           | x                |                                       | x                              |
| Robinson, Angus       | AR      |                                  |                          |                    | x                          |                                           | x                |                                       | x                              |
| Srihari, Narayanan    | NS      |                                  |                          |                    | x                          |                                           | x                |                                       | x                              |
| Thomas, Carys         | CT      |                                  |                          |                    | x                          |                                           | x                |                                       | x                              |
| Wagstaff, John        | JW      |                                  |                          |                    | x                          |                                           | x                |                                       | x                              |
| Wylie, James          | JW      |                                  |                          |                    | x                          |                                           | x                |                                       | x                              |
| Zarkar, Anjali        | AZ      |                                  |                          |                    | x                          |                                           | x                |                                       | x                              |
| Parmar, Max           | MKBP    | x                                | x                        | x                  | x                          | x                                         | x                | x                                     | x                              |
| Sydes, Matt           | MRSy    |                                  | x                        | x                  | x                          | x                                         | x                | x                                     | x                              |

SUPPLEMENTARY FIGURES

Figure S1: Enrolment and Randomization of Patients for the Analysis of Overall Survival

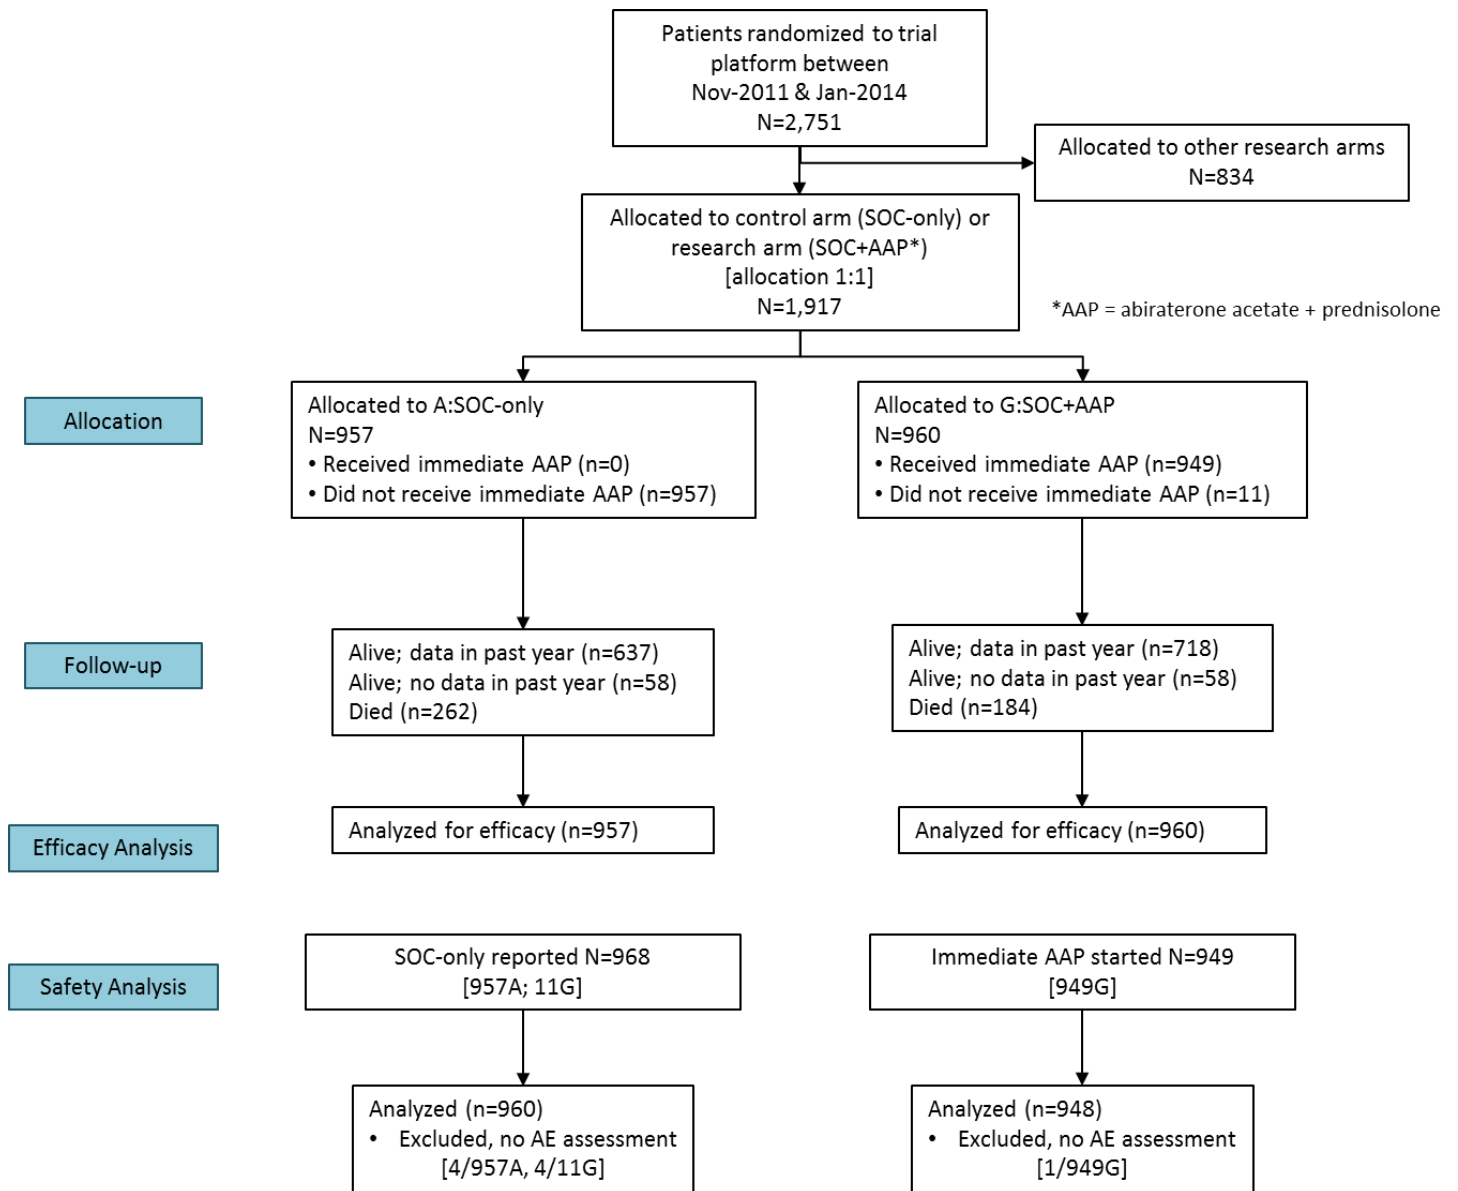



**Figure S2: Time on abiraterone acetate with prednisolone**

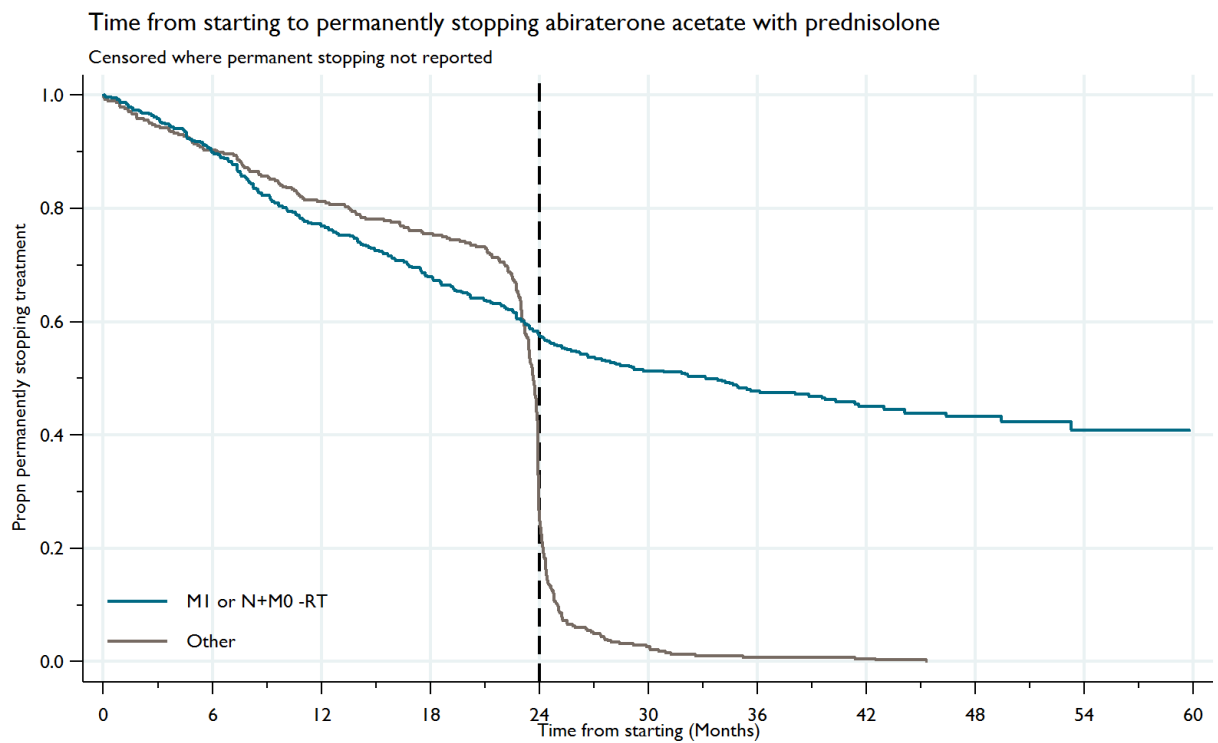

|                | Number of patients (events) |      |     |      |     |      |     |       |     |      |     |      |     |     |    |     |    |     |    |     |   |
|----------------|-----------------------------|------|-----|------|-----|------|-----|-------|-----|------|-----|------|-----|-----|----|-----|----|-----|----|-----|---|
| MI or N+M0 -RT | 565                         | (57) | 502 | (72) | 428 | (50) | 376 | (57)  | 316 | (34) | 262 | (17) | 177 | (8) | 90 | (3) | 54 | (2) | 17 | (0) | 1 |
| Other          | 384                         | (37) | 347 | (35) | 312 | (22) | 290 | (188) | 102 | (92) | 10  | (7)  | 3   | (1) | 2  | (2) | 0  | (0) | 0  | (0) | 0 |

**Key:**

M1 = Patients with metastatic disease at randomisation

N+M0 -RT = Patients with node positive, non-metastatic disease at randomisation who did not receive radiotherapy

Other = Patients with either node negative, non-metastatic disease at randomisation, or with node positive, non-metastatic disease who received radiotherapy

**Figure S3: Time to first Progression-Free Survival Event**

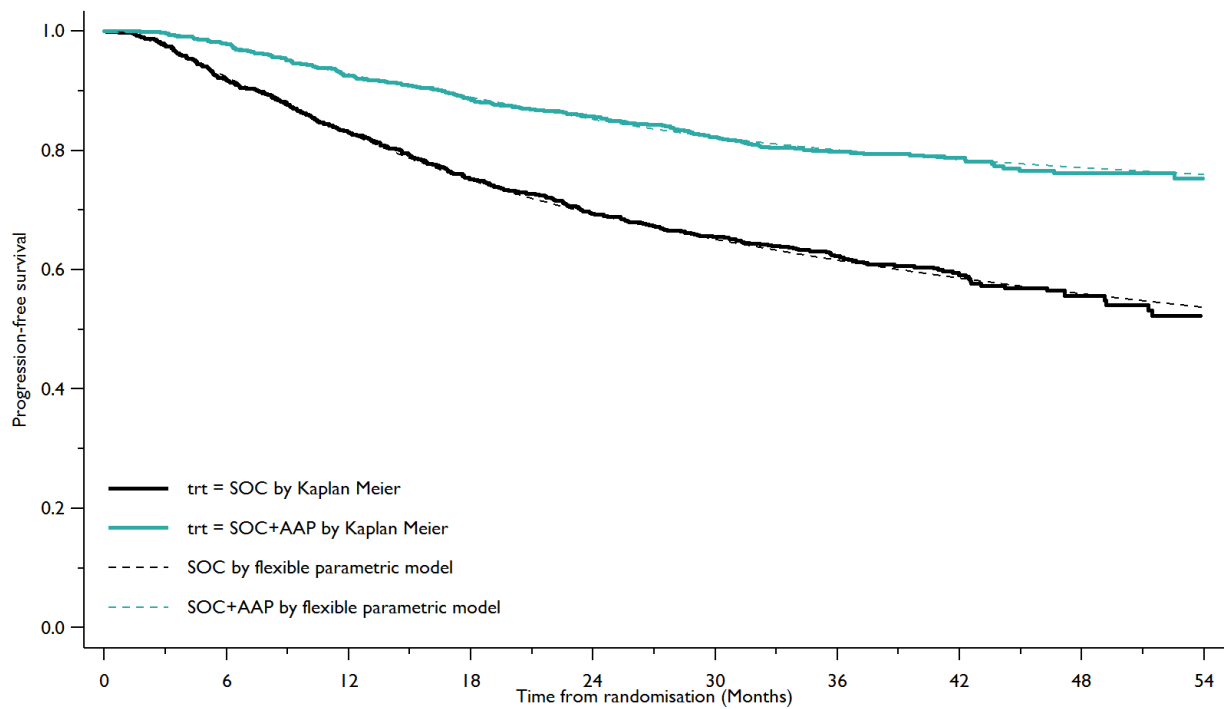

Number of patients (events)

|         |     |       |     |       |     |      |     |      |     |
|---------|-----|-------|-----|-------|-----|------|-----|------|-----|
| SOC     | 957 | (161) | 783 | (128) | 641 | (60) | 392 | (24) | 91  |
| SOC+AAP | 960 | (71)  | 870 | (63)  | 781 | (51) | 504 | (12) | 149 |

HR 0.40 (95%CI 0.34-0.47; p<0.001)

**Key:**

SOC = standard-of-care

AAP = abiraterone acetate + prednisolone

**Figure S4A: Time to first Symptomatic Skeletal Event**

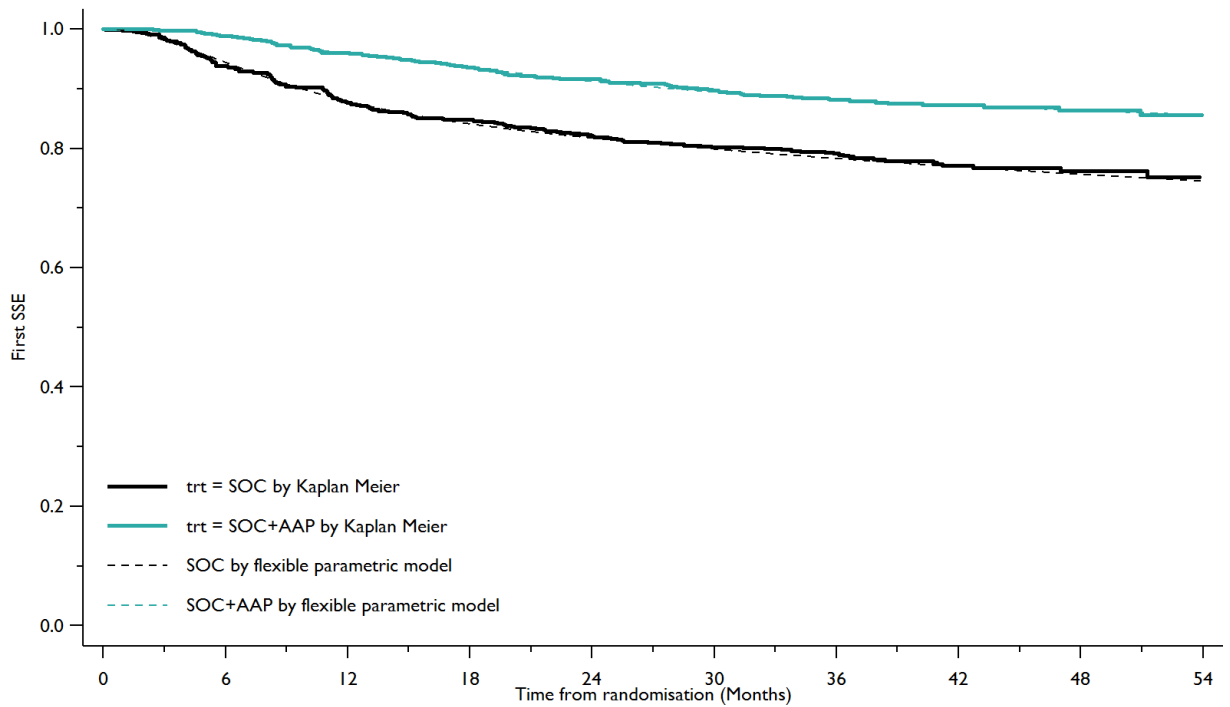

Number of patients (events)

|         |     |      |     |      |     |      |     |      |     |      |     |      |     |     |     |     |     |     |    |
|---------|-----|------|-----|------|-----|------|-----|------|-----|------|-----|------|-----|-----|-----|-----|-----|-----|----|
| SOC     | 957 | (59) | 885 | (58) | 820 | (26) | 770 | (24) | 721 | (17) | 651 | (7)  | 449 | (9) | 222 | (2) | 106 | (1) | 41 |
| SOC+AAP | 960 | (11) | 936 | (27) | 894 | (22) | 848 | (17) | 805 | (17) | 732 | (12) | 517 | (4) | 286 | (2) | 154 | (1) | 49 |

HR 0.46 (95%CI 0.37-0.58; p<0.001)

**Key:**

SOC = standard-of-care

AAP = abiraterone acetate + prednisolone

Figure S4B: Time to first Symptomatic Skeletal Event by baseline metastasis

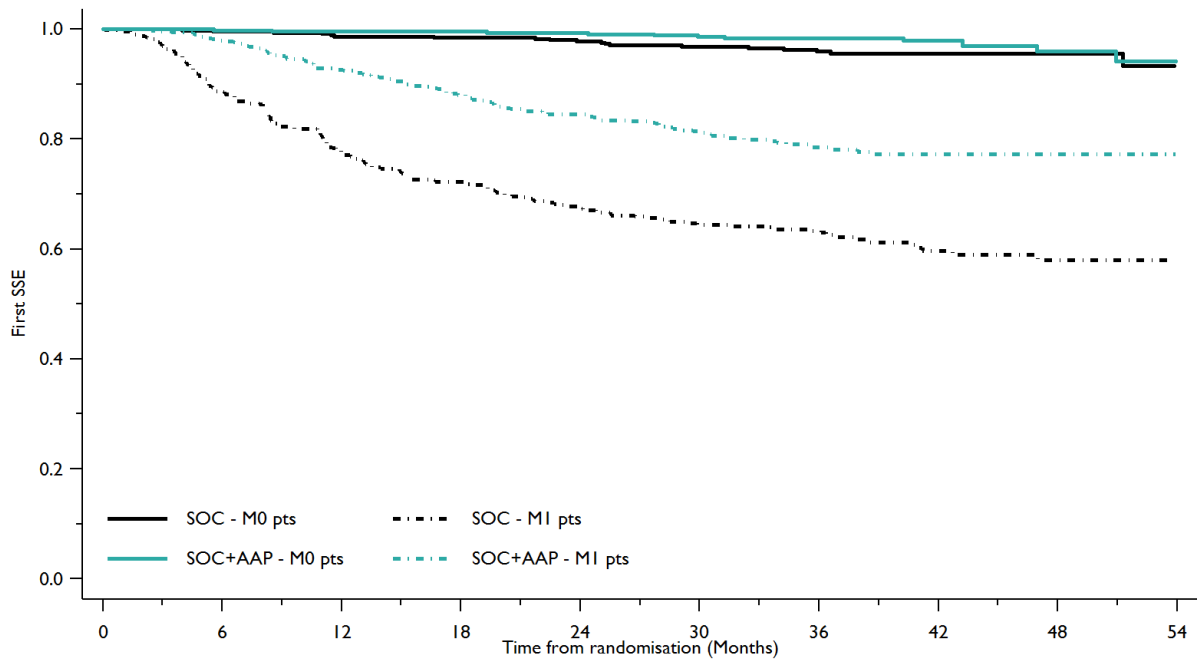

|                  | Number of patients (events) |      |     |      |     |      |     |      |     |      |     |      |     |     |     |     |    |     |    |
|------------------|-----------------------------|------|-----|------|-----|------|-----|------|-----|------|-----|------|-----|-----|-----|-----|----|-----|----|
| SOC - M0 pts     | 455                         | (2)  | 449 | (4)  | 443 | (1)  | 440 | (3)  | 430 | (4)  | 388 | (3)  | 267 | (1) | 129 | (0) | 59 | (1) | 23 |
| SOC+AAP - M0 pts | 460                         | (1)  | 454 | (1)  | 446 | (0)  | 437 | (1)  | 424 | (3)  | 397 | (1)  | 283 | (1) | 151 | (2) | 78 | (1) | 22 |
| SOC - M1 pts     | 502                         | (57) | 436 | (54) | 377 | (25) | 330 | (21) | 291 | (13) | 263 | (4)  | 182 | (8) | 93  | (2) | 47 | (0) | 18 |
| SOC+AAP - M1 pts | 500                         | (10) | 482 | (26) | 448 | (22) | 411 | (16) | 381 | (14) | 335 | (11) | 234 | (3) | 135 | (0) | 76 | (0) | 27 |

M0 patients: HR 0.56 (95%CI 0.27-1.18)

M1 patients: HR 0.45 (95%CI 0.36-0.58)

**Key:**

SOC = standard-of-care

AAP = abiraterone acetate + prednisolone

M0 = non-metastatic patients

M1 = metastatic patients

SUPPLEMENTARY TABLES

Table S1: Full Characteristics of All Patients in the Comparison

|                                     |                         | SOC<br>(n=957) | SOC+AAP<br>(n=960) |
|-------------------------------------|-------------------------|----------------|--------------------|
| <b>Age at randomization (years)</b> | Median (IQR)            | 67 (62-72)     | 67 (63-72)         |
|                                     | Range                   | 39-84          | 42-85              |
| <b>PSA pre-ADT (ng/ml)</b>          | Median (IQR)            | 56 (19-165)    | 51 (19-158)        |
|                                     | Range                   | 0-10530        | 0-21460            |
| <b>Time from diagnosis (Days)</b>   | Median (IQR)            | 77 (57-101)    | 79 (57-100)        |
|                                     | Range                   | 0-4866         | 1-5384             |
|                                     | Missing                 | 2              | 6                  |
| <b>Pain from prostate cancer</b>    | Absent                  | 836 (88%)      | 814 (86%)          |
|                                     | Present                 | 114 (12%)      | 131 (14%)          |
|                                     | Missing                 | 7              | 15                 |
| <b>WHO Performance Status</b>       | 0                       | 744 (78%)      | 745 (78%)          |
|                                     | 1-2                     | 213 (22%)      | 215 (22%)          |
| <b>T-category at randomization</b>  | T0                      | 4 (<1%)        | 3 (<1%)            |
|                                     | T1                      | 13 (1%)        | 7 (1%)             |
|                                     | T2                      | 78 (8%)        | 71 (7%)            |
|                                     | T3                      | 642 (67%)      | 663 (69%)          |
|                                     | T4                      | 176 (18%)      | 167 (17%)          |
|                                     | TX                      | 44 (5%)        | 49 (5%)            |
| <b>N-category at randomization</b>  | N0                      | 438 (46%)      | 434 (45%)          |
|                                     | N+                      | 483 (50%)      | 484 (50%)          |
|                                     | NX                      | 36 (4%)        | 42 (4%)            |
| <b>Metastases at randomization</b>  | None                    | 455 (48%)      | 460 (48%)          |
|                                     | Any metastases          | 502 (52%)      | 500 (52%)          |
|                                     | <i>Bone metastases</i>  | 448 (47%)      | 434 (45%)          |
|                                     | <i>Liver metastases</i> | 8 (1%)         | 7 (1%)             |
|                                     | <i>Lung metastases</i>  | 21 (2%)        | 21 (2%)            |
|                                     | <i>Nodal metastases</i> | 150 (16%)      | 142 (15%)          |
|                                     | <i>Other metastases</i> | 26 (3%)        | 23 (2%)            |

|                                                       |                                        | SOC<br>(n=957) | SOC+AAP<br>(n=960) |
|-------------------------------------------------------|----------------------------------------|----------------|--------------------|
| <b>Broad disease grouping</b>                         |                                        |                |                    |
|                                                       | Newly-diagnosed NOM0                   | 256 (27%)      | 253 (26%)          |
|                                                       | Newly-diagnosed N+M0                   | 187 (20%)      | 182 (19%)          |
|                                                       | Newly-diagnosed M1                     | 476 (50%)      | 465 (48%)          |
|                                                       | Previously treated M0                  | 12 (1%)        | 25 (3%)            |
|                                                       | Previously treated M1                  | 26 (3%)        | 35 (4%)            |
| <b>Gleason sum score</b>                              |                                        |                |                    |
|                                                       | <=7                                    | 223 (23%)      | 221 (23%)          |
|                                                       | 8-10                                   | 721 (75%)      | 715 (74%)          |
|                                                       | Unknown                                | 13 (1%)        | 24 (3%)            |
| <b>Aspirin or NSAID use</b>                           |                                        |                |                    |
|                                                       | No                                     | 718 (75%)      | 714 (74%)          |
|                                                       | Yes                                    | 239 (25%)      | 246 (26%)          |
| <b>Planned or current long-term ADT</b>               |                                        |                |                    |
|                                                       | Orchidectomy                           | 5 (1%)         | 3 (<1%)            |
|                                                       | Bicalutamide                           | 5 (1%)         | 5 (1%)             |
|                                                       | Dual Androgen Blockade                 | 4 (<1%)        | 1 (<1%)            |
|                                                       | LHRH-based                             | 943 (99%)      | 951 (99%)          |
| <b>Time to starting ADT from randomization (Days)</b> |                                        |                |                    |
|                                                       | Median (IQR)                           | -45 (-67; -23) | -44 (-63; -24)     |
|                                                       | Range                                  | -85; 39        | -85; 28            |
|                                                       | Missing                                | 1              | 0                  |
| <b>Planned anti-androgen use</b>                      |                                        |                |                    |
|                                                       | No                                     | 50 (5%)        | 61 (6%)            |
|                                                       | Short-term anti-androgen               | 902 (94%)      | 895 (93%)          |
|                                                       | Long-term anti-androgen                | 5 (1%)         | 4 (<1%)            |
|                                                       | Missing                                | 0              | 0                  |
| <b>Radiotherapy planned</b>                           |                                        |                |                    |
|                                                       | No                                     | 561 (59%)      | 564 (59%)          |
|                                                       | Yes                                    | 396 (41%)      | 396 (41%)          |
| <b>Smoker</b>                                         |                                        |                |                    |
|                                                       | No                                     | 829 (88%)      | 821 (86%)          |
|                                                       | Yes                                    | 118 (12%)      | 129 (14%)          |
|                                                       | Missing on cardiovascular assessment   | 9              | 8                  |
|                                                       | Cardiovascular assessment not received | 1              | 2                  |

|                                 |                                               | SOC<br>(n=957) | SOC+AAP<br>(n=960) |
|---------------------------------|-----------------------------------------------|----------------|--------------------|
| <b>Diabetes</b>                 |                                               |                |                    |
|                                 | No                                            | 848 (89%)      | 844 (88%)          |
|                                 | Yes, type 1                                   | 34 (4%)        | 36 (4%)            |
|                                 | Yes, type 2                                   | 74 (8%)        | 78 (8%)            |
|                                 | <i>Missing on cardiovascular assessment</i>   | 0              | 0                  |
|                                 | <i>Cardiovascular assessment not received</i> | 1              | 2                  |
| <b>Myocardial infarction</b>    |                                               |                |                    |
|                                 | No                                            | 912 (95%)      | 915 (96%)          |
|                                 | Yes, but still fit for trial                  | 44 (5%)        | 43 (4%)            |
|                                 | <i>Missing on cardiovascular assessment</i>   | 0              | 0                  |
|                                 | <i>Cardiovascular assessment not received</i> | 1              | 2                  |
| <b>Cerebrovascular disease</b>  |                                               |                |                    |
|                                 | No                                            | 941 (98%)      | 932 (97%)          |
|                                 | Yes, but still fit for trial                  | 15 (2%)        | 26 (3%)            |
|                                 | <i>Missing on cardiovascular assessment</i>   | 0              | 0                  |
|                                 | <i>Cardiovascular assessment not received</i> | 1              | 2                  |
| <b>Congestive heart failure</b> |                                               |                |                    |
|                                 | No                                            | 954 (100%)     | 954 (100%)         |
|                                 | Yes, but still fit for trial                  | 2 (<1%)        | 4 (<1%)            |
|                                 | <i>Missing on cardiovascular assessment</i>   | 0              | 0                  |
|                                 | <i>Cardiovascular assessment not received</i> | 1              | 2                  |
| <b>Angina</b>                   |                                               |                |                    |
|                                 | No                                            | 920 (96%)      | 924 (96%)          |
|                                 | Yes, but still fit for trial                  | 36 (4%)        | 34 (4%)            |
|                                 | <i>Missing on cardiovascular assessment</i>   | 0              | 0                  |
|                                 | <i>Cardiovascular assessment not received</i> | 1              | 2                  |
| <b>Hypertension</b>             |                                               |                |                    |
|                                 | No                                            | 571 (60%)      | 557 (58%)          |
|                                 | Yes, but still fit for trial                  | 385 (40%)      | 401 (42%)          |
|                                 | <i>Missing on cardiovascular assessment</i>   | 0              | 0                  |
|                                 | <i>Cardiovascular assessment not received</i> | 1              | 2                  |

**Key:**

SOC = standard-of-care

AAP = abiraterone acetate + prednisolone

**Table S2: Study-Drug Exposure in the Abiraterone Acetate with Prednisolone (AAP) Arm**

|                                                                   |  | <b>G</b>              |                  |
|-------------------------------------------------------------------|--|-----------------------|------------------|
|                                                                   |  | <i>SOC+AAP</i>        |                  |
|                                                                   |  | <b>(n=960)</b>        |                  |
| Numbers not starting allocated AAP                                |  | 11 (1%)               |                  |
| Numbers starting allocated AAP                                    |  | 949 (99%)             |                  |
| Time from randomization to starting AAP (Weeks); median (IQR)     |  | 1.3 (0.7-2.6)         |                  |
| Time from starting ADT to starting AAP (Weeks); median (IQR)      |  | 8.0 (5.0-10.9)        |                  |
| Time from starting to last administration* (Months); median (IQR) |  | 23.9 (14.9-46.4)      |                  |
| <b>Breakdown by treatment duration group:</b>                     |  |                       |                  |
|                                                                   |  | <b>M1 or N+M0 -RT</b> | <b>Other**</b>   |
| Total number who started                                          |  | 565                   | 384              |
| Numbers permanently stopping                                      |  | 300                   | 384              |
| Time from starting to last administration* (Months); median (IQR) |  | 33.2 (13.8-NR)        | 23.7 (18.7-24.0) |
| <b>Main reasons for stopping AAP:</b>                             |  |                       |                  |
| Treatment complete                                                |  | 15 (5%)               | 259 (67%)        |
| Progression                                                       |  | 154 (51%)             | 5 (1%)           |
| Excessive toxicity                                                |  | 61 (20%)              | 65 (17%)         |

\*Only in patients starting treatment; censored where permanent stopping not reported

\*\*NOM0 or N+M0 receiving RT; duration capped at 24m



**Table S3: Summary of relapse therapies**

| <b>Treatment started since first progression</b> | <b>A<br/>SOC</b> | <b>G<br/>SOC+AAP</b> |
|--------------------------------------------------|------------------|----------------------|
| <b>Patients randomized</b>                       | 957              | 960                  |
| <b>Patients with progression</b>                 | 535 (56%)        | 248 (26%)            |
| <b>Reported new treatment</b>                    | 477 (89%)        | 196 (79%)            |
| <b>Reported “life-prolonging” treatment</b>      | 310 (58%)        | 131 (53%)            |
| Docetaxel                                        | 200 (37%)        | 115 (46%)            |
| Enzalutamide                                     | 138 (26%)        | 25 (10%)             |
| Abiraterone acetate                              | 120 (22%)        | 8 (3%)               |
| Cabazitaxel                                      | 28 (5%)          | 15 (6%)              |
| Radium-223                                       | 24 (4%)          | 19 (8%)              |
| <b>Other treatments</b>                          |                  |                      |
| Anti-androgens                                   | 387 (72%)        | 83 (33%)             |
| Dexamethasone                                    | 113 (21%)        | 52 (21%)             |
| Zoledronic acid                                  | 78 (15%)         | 40 (16%)             |
| Prednisolone                                     | 83 (16%)         | 33 (13%)             |
| Stilboestrol                                     | 14 (3%)          | 8 (3%)               |
| Other chemotherapy                               | 10 (2%)          | 11 (4%)              |
| Other bisphosphonate                             | 9 (2%)           | 4 (2%)               |
| Sr89                                             | 2 (<1%)          | 0 (0%)               |
| Cox-2 inhibition                                 | 0 (0%)           | 1 (<1%)              |

**Key:**

SOC = standard-of-care

AAP = abiraterone acetate + prednisolone

The following tables provide a detailed breakdown of worst adverse event (AE) reported over entire time on trial, by treatment received (safety population)

**Table S4: Worst AE grade within each category ever (by treatment arm) – Part 1**

|                                  | A<br>SOC   |             | G<br>SOC+AAP |             |
|----------------------------------|------------|-------------|--------------|-------------|
|                                  | N          | %           | N            | %           |
| <b>Hypersensitivity</b>          |            |             |              |             |
| 0                                | 926        | 97%         | 910          | 96%         |
| 1                                | 26         | 3%          | 32           | 3%          |
| 2                                | 6          | 1%          | 4            | 0%          |
| 3                                | 0          | 0%          | 2            | 0%          |
| 4                                | 0          | 0%          | 0            | 0%          |
| 5                                | 0          | 0%          | 0            | 0%          |
| Missing                          | 2          | n/a         | 0            | n/a         |
| <b>Blood/bone marrow</b>         |            |             |              |             |
| 0                                | 587        | 62%         | 482          | 51%         |
| 1                                | 324        | 34%         | 422          | 45%         |
| 2                                | 27         | 3%          | 26           | 3%          |
| 3                                | 11         | 1%          | 13           | 1%          |
| 4                                | 4          | 0%          | 5            | 1%          |
| 5                                | 0          | 0%          | 0            | 0%          |
| Missing                          | 7          | n/a         | 0            | n/a         |
| <b>Cardiovascular disorder</b>   |            |             |              |             |
| 0                                | 753        | 78%         | 541          | 57%         |
| 1                                | 104        | 11%         | 190          | 20%         |
| 2                                | 62         | 6%          | 125          | 13%         |
| 3                                | 34         | 4%          | 80           | 8%          |
| 4                                | 5          | 1%          | 12           | 1%          |
| 5                                | 2          | 0%          | 0            | 0%          |
| Missing                          | 0          | n/a         | 0            | n/a         |
| <b>Gastrointestinal disorder</b> |            |             |              |             |
| 0                                | 445        | 46%         | 308          | 32%         |
| 1                                | 347        | 36%         | 416          | 44%         |
| 2                                | 126        | 13%         | 175          | 18%         |
| 3                                | 34         | 4%          | 46           | 5%          |
| 4                                | 6          | 1%          | 2            | 0%          |
| 5                                | 0          | 0%          | 1            | 0%          |
| Missing                          | 2          | n/a         | 0            | n/a         |
| <b>Endocrine disorder</b>        |            |             |              |             |
| 0                                | 108        | 11%         | 84           | 9%          |
| 1                                | 432        | 45%         | 398          | 42%         |
| 2                                | 284        | 30%         | 337          | 36%         |
| 3                                | 133        | 14%         | 129          | 14%         |
| 4                                | 0          | 0%          | 0            | 0%          |
| 5                                | 0          | 0%          | 0            | 0%          |
| Missing                          | 3          | n/a         | 0            | n/a         |
| <b>Total</b>                     | <b>960</b> | <b>100%</b> | <b>948</b>   | <b>100%</b> |

Blood/bone marrow AEs shown in more detail in Table S8

Cardiovascular disorder AEs shown in more detail in Tables S9-S11

Gastrointestinal disorder AEs shown in more detail in Tables S12-S14

Endocrine disorder AEs shown in more detail in Table S15

**Table S5: Worst AE grade within each category ever (by treatment arm) – Part 2**

|                                    | A<br>SOC  |           | G<br>SOC+AAP |           |
|------------------------------------|-----------|-----------|--------------|-----------|
|                                    | N         | %         | N            | %         |
| <b>General disorder</b>            |           |           |              |           |
| 0                                  | 335       | 35%       | 221          | 23%       |
| 1                                  | 442       | 46%       | 446          | 47%       |
| 2                                  | 154       | 16%       | 236          | 25%       |
| 3                                  | <b>22</b> | <b>2%</b> | <b>36</b>    | <b>4%</b> |
| 4                                  | <b>7</b>  | <b>1%</b> | <b>8</b>     | <b>1%</b> |
| 5                                  | <b>0</b>  | <b>0%</b> | <b>1</b>     | <b>0%</b> |
| Missing                            | 0         | n/a       | 0            | n/a       |
| <b>Hepatic disorder</b>            |           |           |              |           |
| 0                                  | 781       | 82%       | 631          | 67%       |
| 1                                  | 144       | 15%       | 188          | 20%       |
| 2                                  | 17        | 2%        | 59           | 6%        |
| 3                                  | <b>11</b> | <b>1%</b> | <b>65</b>    | <b>7%</b> |
| 4                                  | <b>1</b>  | <b>0%</b> | <b>5</b>     | <b>1%</b> |
| 5                                  | <b>0</b>  | <b>0%</b> | <b>0</b>     | <b>0%</b> |
| Missing                            | 6         | n/a       | 0            | n/a       |
| <b>Lab abnormalities</b>           |           |           |              |           |
| 0                                  | 628       | 66%       | 462          | 49%       |
| 1                                  | 270       | 28%       | 392          | 41%       |
| 2                                  | 35        | 4%        | 60           | 6%        |
| 3                                  | <b>19</b> | <b>2%</b> | <b>30</b>    | <b>3%</b> |
| 4                                  | <b>2</b>  | <b>0%</b> | <b>4</b>     | <b>0%</b> |
| 5                                  | <b>0</b>  | <b>0%</b> | <b>0</b>     | <b>0%</b> |
| Missing                            | 6         | n/a       | 0            | n/a       |
| <b>Metabolic &amp; Nutritional</b> |           |           |              |           |
| 0                                  | 796       | 83%       | 782          | 82%       |
| 1                                  | 146       | 15%       | 139          | 15%       |
| 2                                  | 13        | 1%        | 22           | 2%        |
| 3                                  | <b>4</b>  | <b>0%</b> | <b>5</b>     | <b>1%</b> |
| 4                                  | <b>0</b>  | <b>0%</b> | <b>0</b>     | <b>0%</b> |
| 5                                  | <b>0</b>  | <b>0%</b> | <b>0</b>     | <b>0%</b> |
| Missing                            | 1         | n/a       | 0            | n/a       |
| <b>Musculoskeletal</b>             |           |           |              |           |
| 0                                  | 309       | 32%       | 266          | 28%       |
| 1                                  | 417       | 43%       | 388          | 41%       |
| 2                                  | 187       | 19%       | 226          | 24%       |
| 3                                  | <b>44</b> | <b>5%</b> | <b>68</b>    | <b>7%</b> |
| 4                                  | <b>2</b>  | <b>0%</b> | <b>0</b>     | <b>0%</b> |
| 5                                  | <b>0</b>  | <b>0%</b> | <b>0</b>     | <b>0%</b> |
| Missing                            | 1         | n/a       | 0            | n/a       |

General disorder AEs shown in more detail in Tables S16-S17

Hepatic disorder AEs shown in more detail in Tables S18-S19

Lab abnormalities AEs shown in more detail in Table S20

Metabolic & nutritional AEs shown in more detail in Table S21

Musculoskeletal AEs shown in more detail in Tables S22-S23

**Table S6: Worst AE grade within each category ever (by treatment arm) – Part 3**

|                             | A<br>SOC   |             | G<br>SOC+AAP |             |
|-----------------------------|------------|-------------|--------------|-------------|
|                             | N          | %           | N            | %           |
| <b>Nervous system</b>       |            |             |              |             |
| 0                           | 705        | 74%         | 582          | 61%         |
| 1                           | 200        | 21%         | 262          | 28%         |
| 2                           | 35         | 4%          | 72           | 8%          |
| <b>3</b>                    | <b>15</b>  | <b>2%</b>   | <b>26</b>    | <b>3%</b>   |
| 4                           | 3          | 0%          | 4            | 0%          |
| 5                           | 0          | 0%          | 2            | 0%          |
| Missing                     | 2          | n/a         | 0            | n/a         |
| <b>Ocular disorder</b>      |            |             |              |             |
| 0                           | 881        | 92%         | 816          | 86%         |
| 1                           | 63         | 7%          | 105          | 11%         |
| 2                           | 9          | 1%          | 10           | 1%          |
| <b>3</b>                    | <b>5</b>   | <b>1%</b>   | <b>17</b>    | <b>2%</b>   |
| 4                           | 0          | 0%          | 0            | 0%          |
| 5                           | 0          | 0%          | 0            | 0%          |
| Missing                     | 2          | n/a         | 0            | n/a         |
| <b>Psychiatric disorder</b> |            |             |              |             |
| 0                           | 631        | 66%         | 547          | 58%         |
| 1                           | 246        | 26%         | 277          | 29%         |
| 2                           | 71         | 7%          | 100          | 11%         |
| <b>3</b>                    | <b>10</b>  | <b>1%</b>   | <b>23</b>    | <b>2%</b>   |
| 4                           | 0          | 0%          | 1            | 0%          |
| 5                           | 0          | 0%          | 0            | 0%          |
| Missing                     | 2          | n/a         | 0            | n/a         |
| <b>Renal disorder</b>       |            |             |              |             |
| 0                           | 284        | 30%         | 268          | 28%         |
| 1                           | 381        | 40%         | 373          | 39%         |
| 2                           | 263        | 27%         | 271          | 29%         |
| <b>3</b>                    | <b>28</b>  | <b>3%</b>   | <b>31</b>    | <b>3%</b>   |
| 4                           | 3          | 0%          | 5            | 1%          |
| 5                           | 0          | 0%          | 0            | 0%          |
| Missing                     | 1          | n/a         | 0            | n/a         |
| <b>Respiratory disorder</b> |            |             |              |             |
| 0                           | 642        | 67%         | 487          | 51%         |
| 1                           | 162        | 17%         | 218          | 23%         |
| 2                           | 132        | 14%         | 199          | 21%         |
| <b>3</b>                    | <b>19</b>  | <b>2%</b>   | <b>37</b>    | <b>4%</b>   |
| 4                           | 3          | 0%          | 2            | 0%          |
| 5                           | 1          | 0%          | 5            | 1%          |
| Missing                     | 1          | n/a         | 0            | n/a         |
| <b>Total</b>                | <b>960</b> | <b>100%</b> | <b>948</b>   | <b>100%</b> |

Nervous system AEs shown in more detail in Table S24

Ocular disorder AEs shown in more detail in Table S25

Psychiatric disorder AEs shown in more detail in Table S26

Renal disorder AEs shown in more detail in Tables S27-S28

Respiratory disorder AEs shown in more detail in Tables S29-S30

**Table S7: Worst AE grade within each category ever (by treatment arm) – Part 4**

|                      | A<br>SOC   |             | G<br>SOC+AAP |             |
|----------------------|------------|-------------|--------------|-------------|
|                      | N          | %           | N            | %           |
| <b>Skin disorder</b> |            |             |              |             |
| 0                    | 731        | 76%         | 624          | 66%         |
| 1                    | 178        | 19%         | 242          | 26%         |
| 2                    | 41         | 4%          | 65           | 7%          |
| 3                    | <b>8</b>   | <b>1%</b>   | <b>16</b>    | <b>2%</b>   |
| 4                    | <b>0</b>   | <b>0%</b>   | <b>1</b>     | <b>0%</b>   |
| 5                    | <b>0</b>   | <b>0%</b>   | <b>0</b>     | <b>0%</b>   |
| Missing              | 2          | n/a         | 0            | n/a         |
| <b>Total</b>         | <b>960</b> | <b>100%</b> | <b>948</b>   | <b>100%</b> |

Skin disorder AEs shown in more detail in  
Table S31

Table S8: Worst blood/bone marrow grade within each category ever (by treatment arm)

|                                        | A<br>SOC-only |             | G<br>SOC+AAP |             |
|----------------------------------------|---------------|-------------|--------------|-------------|
|                                        | N             | %           | N            | %           |
| <b>Neutropenia (G1-4)</b>              |               |             |              |             |
| 0                                      | 913           | 96%         | 875          | 92%         |
| 1                                      | 35            | 4%          | 58           | 6%          |
| 2                                      | 3             | 0%          | 5            | 1%          |
| 3                                      | 1             | 0%          | 8            | 1%          |
| 4                                      | 1             | 0%          | 2            | 0%          |
| 5                                      | 0             | 0%          | 0            | 0%          |
| Missing                                | 7             | n/a         | 0            | n/a         |
| <b>Febrile neutropenia (G3-5)</b>      |               |             |              |             |
| 0                                      | 951           | 100%        | 944          | 100%        |
| 1                                      | 0             | 0%          | 0            | 0%          |
| 2                                      | 0             | 0%          | 0            | 0%          |
| 3                                      | 2             | 0%          | 4            | 0%          |
| 4                                      | 0             | 0%          | 0            | 0%          |
| 5                                      | 0             | 0%          | 0            | 0%          |
| Missing                                | 7             | n/a         | 0            | n/a         |
| <b>Decreased platelet count (G1-4)</b> |               |             |              |             |
| 0                                      | 917           | 96%         | 897          | 95%         |
| 1                                      | 33            | 3%          | 45           | 5%          |
| 2                                      | 3             | 0%          | 4            | 0%          |
| 3                                      | 0             | 0%          | 1            | 0%          |
| 4                                      | 0             | 0%          | 1            | 0%          |
| 5                                      | 0             | 0%          | 0            | 0%          |
| Missing                                | 7             | n/a         | 0            | n/a         |
| <b>Anaemia</b>                         |               |             |              |             |
| 0                                      | 618           | 65%         | 521          | 55%         |
| 1                                      | 301           | 32%         | 395          | 42%         |
| 2                                      | 22            | 2%          | 25           | 3%          |
| 3                                      | 9             | 1%          | 5            | 1%          |
| 4                                      | 3             | 0%          | 2            | 0%          |
| 5                                      | 0             | 0%          | 0            | 0%          |
| Missing                                | 7             | n/a         | 0            | n/a         |
| <b>Total</b>                           | <b>960</b>    | <b>100%</b> | <b>948</b>   | <b>100%</b> |

Table S9: Worst cardiac disorder grade within each category ever (by treatment arm) – Part 1

|                                             | A<br><i>SOC-only</i> |             | G<br><i>SOC+AAP</i> |             |
|---------------------------------------------|----------------------|-------------|---------------------|-------------|
|                                             | N                    | %           | N                   | %           |
| <b>Cardiac dysrhythmia</b>                  |                      |             |                     |             |
| 0                                           | 921                  | 96%         | 893                 | 94%         |
| 1                                           | 24                   | 3%          | 27                  | 3%          |
| 2                                           | 12                   | 1%          | 14                  | 1%          |
| 3                                           | <b>2</b>             | <b>0%</b>   | <b>12</b>           | <b>1%</b>   |
| 4                                           | <b>0</b>             | <b>0%</b>   | <b>2</b>            | <b>0%</b>   |
| 5                                           | <b>0</b>             | <b>0%</b>   | <b>0</b>            | <b>0%</b>   |
| <i>Missing</i>                              | <i>1</i>             | <i>n/a</i>  | <i>0</i>            | <i>n/a</i>  |
| <b>Hypertension</b>                         |                      |             |                     |             |
| 0                                           | 828                  | 86%         | 649                 | 68%         |
| 1                                           | 71                   | 7%          | 152                 | 16%         |
| 2                                           | 47                   | 5%          | 103                 | 11%         |
| 3                                           | <b>13</b>            | <b>1%</b>   | <b>44</b>           | <b>5%</b>   |
| 4                                           | <b>0</b>             | <b>0%</b>   | <b>0</b>            | <b>0%</b>   |
| 5                                           | <b>0</b>             | <b>0%</b>   | <b>0</b>            | <b>0%</b>   |
| <i>Missing</i>                              | <i>1</i>             | <i>n/a</i>  | <i>0</i>            | <i>n/a</i>  |
| <b>Hypotension</b>                          |                      |             |                     |             |
| 0                                           | 939                  | 98%         | 905                 | 95%         |
| 1                                           | 13                   | 1%          | 33                  | 3%          |
| 2                                           | 5                    | 1%          | 9                   | 1%          |
| 3                                           | <b>2</b>             | <b>0%</b>   | <b>1</b>            | <b>0%</b>   |
| 4                                           | <b>0</b>             | <b>0%</b>   | <b>0</b>            | <b>0%</b>   |
| 5                                           | <b>0</b>             | <b>0%</b>   | <b>0</b>            | <b>0%</b>   |
| <i>Missing</i>                              | <i>1</i>             | <i>n/a</i>  | <i>0</i>            | <i>n/a</i>  |
| <b>Acute coronary syndrome<br/>incl. MI</b> |                      |             |                     |             |
| 0                                           | 950                  | 99%         | 934                 | 99%         |
| 1                                           | 0                    | 0%          | 4                   | 0%          |
| 2                                           | 0                    | 0%          | 0                   | 0%          |
| 3                                           | <b>3</b>             | <b>0%</b>   | <b>5</b>            | <b>1%</b>   |
| 4                                           | <b>4</b>             | <b>0%</b>   | <b>5</b>            | <b>1%</b>   |
| 5                                           | <b>2</b>             | <b>0%</b>   | <b>0</b>            | <b>0%</b>   |
| <i>Missing</i>                              | <i>1</i>             | <i>n/a</i>  | <i>0</i>            | <i>n/a</i>  |
| <b>Heart failure</b>                        |                      |             |                     |             |
| 0                                           | 331                  | 100%        | 459                 | 100%        |
| 1                                           | 0                    | 0%          | 0                   | 0%          |
| 2                                           | 0                    | 0%          | 0                   | 0%          |
| 3                                           | <b>0</b>             | <b>0%</b>   | <b>0</b>            | <b>0%</b>   |
| 4                                           | <b>0</b>             | <b>0%</b>   | <b>0</b>            | <b>0%</b>   |
| 5                                           | <b>0</b>             | <b>0%</b>   | <b>0</b>            | <b>0%</b>   |
| <i>Missing</i>                              | <i>629</i>           | <i>n/a</i>  | <i>489</i>          | <i>n/a</i>  |
| <b>Total</b>                                | <b>960</b>           | <b>100%</b> | <b>948</b>          | <b>100%</b> |

Table S10: Worst cardiac disorder grade within each category ever (by treatment arm) – Part 2

|                               | A<br><i>SOC-only</i> |             | G<br><i>SOC+AAP</i> |             |
|-------------------------------|----------------------|-------------|---------------------|-------------|
|                               | N                    | %           | N                   | %           |
| <b>Stroke</b>                 |                      |             |                     |             |
| 0                             | 330                  | 100%        | 459                 | 100%        |
| 1                             | 0                    | 0%          | 0                   | 0%          |
| 2                             | 0                    | 0%          | 0                   | 0%          |
| 3                             | 1                    | 0%          | 0                   | 0%          |
| 4                             | 0                    | 0%          | 0                   | 0%          |
| 5                             | 0                    | 0%          | 0                   | 0%          |
| <i>Missing</i>                | 629                  | <i>n/a</i>  | 489                 | <i>n/a</i>  |
| <b>TIA (G1-2)</b>             |                      |             |                     |             |
| 0                             | 331                  | 100%        | 459                 | 100%        |
| 1                             | 0                    | 0%          | 0                   | 0%          |
| 2                             | 0                    | 0%          | 0                   | 0%          |
| 3                             | 0                    | 0%          | 0                   | 0%          |
| 4                             | 0                    | 0%          | 0                   | 0%          |
| 5                             | 0                    | 0%          | 0                   | 0%          |
| <i>Missing</i>                | 629                  | <i>n/a</i>  | 489                 | <i>n/a</i>  |
| <b>Thromboembolic event</b>   |                      |             |                     |             |
| 0                             | 331                  | 100%        | 459                 | 100%        |
| 1                             | 0                    | 0%          | 0                   | 0%          |
| 2                             | 0                    | 0%          | 0                   | 0%          |
| 3                             | 0                    | 0%          | 0                   | 0%          |
| 4                             | 0                    | 0%          | 0                   | 0%          |
| 5                             | 0                    | 0%          | 0                   | 0%          |
| <i>Missing</i>                | 629                  | <i>n/a</i>  | 489                 | <i>n/a</i>  |
| <b>Other cardiac disorder</b> |                      |             |                     |             |
| 0                             | 902                  | 94%         | 849                 | 90%         |
| 1                             | 29                   | 3%          | 49                  | 5%          |
| 2                             | 11                   | 1%          | 17                  | 2%          |
| 3                             | 17                   | 2%          | 28                  | 3%          |
| 4                             | 1                    | 0%          | 5                   | 1%          |
| 5                             | 0                    | 0%          | 0                   | 0%          |
| <i>Missing</i>                | 0                    | <i>n/a</i>  | 0                   | <i>n/a</i>  |
| <b>Total</b>                  | <b>960</b>           | <b>100%</b> | <b>948</b>          | <b>100%</b> |



**Table S11: Worst hypertension toxicity reported ever, split by hypertensive status at baseline (by treatment arm)**

|                                    |                | A          |             | G          |             |
|------------------------------------|----------------|------------|-------------|------------|-------------|
|                                    |                | SOC-only   |             | SOC+AAP    |             |
|                                    |                | N          | %           | N          | %           |
| <b>Non-hypertensive</b>            | 0              | 518        | 91%         | 380        | 69%         |
|                                    | 1              | 27         | 5%          | 88         | 16%         |
|                                    | 2              | 21         | 4%          | 67         | 12%         |
|                                    | <b>3</b>       | <b>6</b>   | <b>1%</b>   | <b>17</b>  | <b>3%</b>   |
|                                    | 4              | 0          | 0%          | 0          | 0%          |
|                                    | 5              | 0          | 0%          | 0          | 0%          |
|                                    | <i>Missing</i> | 1          | <i>n/a</i>  | 0          | <i>n/a</i>  |
| <b>Hypertensive</b>                | 0              | 310        | 80%         | 269        | 68%         |
|                                    | 1              | 44         | 11%         | 63         | 16%         |
|                                    | 2              | 25         | 6%          | 36         | 9%          |
|                                    | <b>3</b>       | <b>7</b>   | <b>2%</b>   | <b>27</b>  | <b>7%</b>   |
|                                    | 4              | 0          | 0%          | 0          | 0%          |
|                                    | 5              | 0          | 0%          | 0          | 0%          |
|                                    | <i>Missing</i> | 1          | <i>n/a</i>  | 0          | <i>n/a</i>  |
| <i>Missing hypertensive status</i> | 1              | <i>n/a</i> | 1           | <i>n/a</i> |             |
| <b>Total</b>                       |                | <b>960</b> | <b>100%</b> | <b>948</b> | <b>100%</b> |

Table S12: Worst gastrointestinal disorder grade within each category ever (by treatment arm) – Part 1

|                                      |                | A          |             | G          |             |
|--------------------------------------|----------------|------------|-------------|------------|-------------|
|                                      |                | SOC-only   |             | SOC+AAP    |             |
|                                      |                | N          | %           | N          | %           |
| <b>Abdominal pain (G1-3)</b>         | 0              | 834        | 87%         | 771        | 81%         |
|                                      | 1              | 89         | 9%          | 134        | 14%         |
|                                      | 2              | 27         | 3%          | 34         | 4%          |
|                                      | <b>3</b>       | <b>8</b>   | <b>1%</b>   | <b>9</b>   | <b>1%</b>   |
|                                      | <b>4</b>       | <b>0</b>   | <b>0%</b>   | <b>0</b>   | <b>0%</b>   |
|                                      | <b>5</b>       | <b>0</b>   | <b>0%</b>   | <b>0</b>   | <b>0%</b>   |
|                                      | <i>Missing</i> | 2          | <i>n/a</i>  | 0          | <i>n/a</i>  |
| <b>Constipation</b>                  | 0              | 740        | 77%         | 660        | 70%         |
|                                      | 1              | 173        | 18%         | 238        | 25%         |
|                                      | 2              | 36         | 4%          | 45         | 5%          |
|                                      | <b>3</b>       | <b>9</b>   | <b>1%</b>   | <b>5</b>   | <b>1%</b>   |
|                                      | <b>4</b>       | <b>0</b>   | <b>0%</b>   | <b>0</b>   | <b>0%</b>   |
|                                      | <b>5</b>       | <b>0</b>   | <b>0%</b>   | <b>0</b>   | <b>0%</b>   |
|                                      | <i>Missing</i> | 2          | <i>n/a</i>  | 0          | <i>n/a</i>  |
| <b>Diarrhoea</b>                     | 0              | 714        | 75%         | 653        | 69%         |
|                                      | 1              | 194        | 20%         | 229        | 24%         |
|                                      | 2              | 42         | 4%          | 53         | 6%          |
|                                      | <b>3</b>       | <b>8</b>   | <b>1%</b>   | <b>13</b>  | <b>1%</b>   |
|                                      | <b>4</b>       | <b>0</b>   | <b>0%</b>   | <b>0</b>   | <b>0%</b>   |
|                                      | <b>5</b>       | <b>0</b>   | <b>0%</b>   | <b>0</b>   | <b>0%</b>   |
|                                      | <i>Missing</i> | 2          | <i>n/a</i>  | 0          | <i>n/a</i>  |
| <b>Indigestion (Dyspepsia; G1-3)</b> | 0              | 859        | 90%         | 793        | 84%         |
|                                      | 1              | 85         | 9%          | 129        | 14%         |
|                                      | 2              | 14         | 1%          | 25         | 3%          |
|                                      | <b>3</b>       | <b>0</b>   | <b>0%</b>   | <b>1</b>   | <b>0%</b>   |
|                                      | <b>4</b>       | <b>0</b>   | <b>0%</b>   | <b>0</b>   | <b>0%</b>   |
|                                      | <b>5</b>       | <b>0</b>   | <b>0%</b>   | <b>0</b>   | <b>0%</b>   |
|                                      | <i>Missing</i> | 2          | <i>n/a</i>  | 0          | <i>n/a</i>  |
| <b>Flatulence (G1-2)</b>             | 0              | 827        | 86%         | 807        | 85%         |
|                                      | 1              | 104        | 11%         | 119        | 13%         |
|                                      | 2              | 27         | 3%          | 22         | 2%          |
|                                      | <b>3</b>       | <b>0</b>   | <b>0%</b>   | <b>0</b>   | <b>0%</b>   |
|                                      | <b>4</b>       | <b>0</b>   | <b>0%</b>   | <b>0</b>   | <b>0%</b>   |
|                                      | <b>5</b>       | <b>0</b>   | <b>0%</b>   | <b>0</b>   | <b>0%</b>   |
|                                      | <i>Missing</i> | 2          | <i>n/a</i>  | 0          | <i>n/a</i>  |
| <b>Total</b>                         |                | <b>960</b> | <b>100%</b> | <b>948</b> | <b>100%</b> |

Table S13: Worst ever gastrointestinal disorder grade (by treatment arm) – Part 2

|                                  |                | A          |             | G          |             |
|----------------------------------|----------------|------------|-------------|------------|-------------|
|                                  |                | SOC-only   |             | SOC+AAP    |             |
|                                  |                | N          | %           | N          | %           |
| <b>GI haemorrhage (CTCAE V3)</b> |                |            |             |            |             |
|                                  | 0              | 887        | 93%         | 879        | 93%         |
|                                  | 1              | 51         | 5%          | 57         | 6%          |
|                                  | 2              | 14         | 1%          | 12         | 1%          |
|                                  | <b>3</b>       | <b>5</b>   | <b>1%</b>   | <b>0</b>   | <b>0%</b>   |
|                                  | 4              | 1          | 0%          | 0          | 0%          |
|                                  | 5              | 0          | 0%          | 0          | 0%          |
|                                  | <i>Missing</i> | 2          | <i>n/a</i>  | 0          | <i>n/a</i>  |
| <b>Upper GI haemorrhage</b>      |                |            |             |            |             |
|                                  | 0              | 331        | 100%        | 459        | 100%        |
|                                  | 1              | 0          | 0%          | 0          | 0%          |
|                                  | 2              | 0          | 0%          | 0          | 0%          |
|                                  | <b>3</b>       | <b>0</b>   | <b>0%</b>   | <b>0</b>   | <b>0%</b>   |
|                                  | 4              | 0          | 0%          | 0          | 0%          |
|                                  | 5              | 0          | 0%          | 0          | 0%          |
|                                  | <i>Missing</i> | 629        | <i>n/a</i>  | 489        | <i>n/a</i>  |
| <b>Lower GI haemorrhage</b>      |                |            |             |            |             |
|                                  | 0              | 331        | 100%        | 459        | 100%        |
|                                  | 1              | 0          | 0%          | 0          | 0%          |
|                                  | 2              | 0          | 0%          | 1          | 0%          |
|                                  | <b>3</b>       | <b>0</b>   | <b>0%</b>   | <b>0</b>   | <b>0%</b>   |
|                                  | 4              | 0          | 0%          | 0          | 0%          |
|                                  | 5              | 0          | 0%          | 0          | 0%          |
|                                  | <i>Missing</i> | 629        | <i>n/a</i>  | 489        | <i>n/a</i>  |
| <b>Nausea (G1-3)</b>             |                |            |             |            |             |
|                                  | 0              | 866        | 90%         | 797        | 84%         |
|                                  | 1              | 81         | 8%          | 132        | 14%         |
|                                  | 2              | 10         | 1%          | 18         | 2%          |
|                                  | <b>3</b>       | <b>1</b>   | <b>0%</b>   | <b>1</b>   | <b>0%</b>   |
|                                  | 4              | 0          | 0%          | 0          | 0%          |
|                                  | 5              | 0          | 0%          | 0          | 0%          |
|                                  | <i>Missing</i> | 2          | <i>n/a</i>  | 0          | <i>n/a</i>  |
| <b>Vomiting</b>                  |                |            |             |            |             |
|                                  | 0              | 919        | 96%         | 863        | 91%         |
|                                  | 1              | 34         | 4%          | 63         | 7%          |
|                                  | 2              | 3          | 0%          | 18         | 2%          |
|                                  | <b>3</b>       | <b>1</b>   | <b>0%</b>   | <b>4</b>   | <b>0%</b>   |
|                                  | 4              | 1          | 0%          | 0          | 0%          |
|                                  | 5              | 0          | 0%          | 0          | 0%          |
|                                  | <i>Missing</i> | 2          | <i>n/a</i>  | 0          | <i>n/a</i>  |
| <b>Total</b>                     |                | <b>960</b> | <b>100%</b> | <b>948</b> | <b>100%</b> |

Table S14: Worst ever gastrointestinal disorder grade (by treatment arm) – Part 3

|                                        |                | A          |             | G          |             |
|----------------------------------------|----------------|------------|-------------|------------|-------------|
|                                        |                | SOC-only   |             | SOC+AAP    |             |
|                                        |                | N          | %           | N          | %           |
| <b>Mucositis (Stomatitis)</b>          | 0              | 938        | 98%         | 915        | 97%         |
|                                        | 1              | 19         | 2%          | 27         | 3%          |
|                                        | 2              | 1          | 0%          | 5          | 1%          |
|                                        | <b>3</b>       | <b>0</b>   | <b>0%</b>   | <b>1</b>   | <b>0%</b>   |
|                                        | <b>4</b>       | <b>0</b>   | <b>0%</b>   | <b>0</b>   | <b>0%</b>   |
|                                        | <b>5</b>       | <b>0</b>   | <b>0%</b>   | <b>0</b>   | <b>0%</b>   |
|                                        | <i>Missing</i> | 2          | <i>n/a</i>  | 0          | <i>n/a</i>  |
| <b>Other gastrointestinal disorder</b> | 0              | 804        | 84%         | 730        | 77%         |
|                                        | 1              | 111        | 12%         | 154        | 16%         |
|                                        | 2              | 27         | 3%          | 39         | 4%          |
|                                        | <b>3</b>       | <b>12</b>  | <b>1%</b>   | <b>22</b>  | <b>2%</b>   |
|                                        | <b>4</b>       | <b>4</b>   | <b>0%</b>   | <b>2</b>   | <b>0%</b>   |
|                                        | <b>5</b>       | <b>0</b>   | <b>0%</b>   | <b>1</b>   | <b>0%</b>   |
|                                        | <i>Missing</i> | 2          | <i>n/a</i>  | 0          | <i>n/a</i>  |
| <b>Total</b>                           |                | <b>960</b> | <b>100%</b> | <b>948</b> | <b>100%</b> |

Table S15: Worst endocrine disorder grade within each category ever (by treatment arm)

|                                 | A<br><i>SOC-only</i> |             | G<br><i>SOC+AAP</i> |             |
|---------------------------------|----------------------|-------------|---------------------|-------------|
|                                 | N                    | %           | N                   | %           |
| <b>Hot flashes (G1-3)</b>       |                      |             |                     |             |
| 0                               | 145                  | 15%         | 116                 | 12%         |
| 1                               | 510                  | 53%         | 496                 | 52%         |
| 2                               | 263                  | 27%         | 295                 | 31%         |
| 3                               | 39                   | 4%          | 41                  | 4%          |
| 4                               | 0                    | 0%          | 0                   | 0%          |
| 5                               | 0                    | 0%          | 0                   | 0%          |
| <i>Missing</i>                  | 3                    | <i>n/a</i>  | 0                   | <i>n/a</i>  |
| <b>Impotence (G1-3)</b>         |                      |             |                     |             |
| 0                               | 455                  | 48%         | 428                 | 45%         |
| 1                               | 262                  | 28%         | 262                 | 28%         |
| 2                               | 128                  | 13%         | 160                 | 17%         |
| 3                               | 105                  | 11%         | 97                  | 10%         |
| 4                               | 0                    | 0%          | 0                   | 0%          |
| 5                               | 0                    | 0%          | 0                   | 0%          |
| <i>Missing</i>                  | 10                   | <i>n/a</i>  | 1                   | <i>n/a</i>  |
| <b>Gynaecomastia (G1-3)</b>     |                      |             |                     |             |
| 0                               | 756                  | 86%         | 795                 | 86%         |
| 1                               | 118                  | 13%         | 124                 | 13%         |
| 2                               | 9                    | 1%          | 4                   | 0%          |
| 3                               | 0                    | 0%          | 0                   | 0%          |
| 4                               | 0                    | 0%          | 0                   | 0%          |
| 5                               | 0                    | 0%          | 0                   | 0%          |
| <i>Missing</i>                  | 77                   | <i>n/a</i>  | 25                  | <i>n/a</i>  |
| <b>Glucose intolerance</b>      |                      |             |                     |             |
| 0                               | 828                  | 94%         | 823                 | 89%         |
| 1                               | 28                   | 3%          | 56                  | 6%          |
| 2                               | 23                   | 3%          | 38                  | 4%          |
| 3                               | 2                    | 0%          | 6                   | 1%          |
| 4                               | 0                    | 0%          | 0                   | 0%          |
| 5                               | 0                    | 0%          | 0                   | 0%          |
| <i>Missing</i>                  | 79                   | <i>n/a</i>  | 25                  | <i>n/a</i>  |
| <b>Other endocrine disorder</b> |                      |             |                     |             |
| 0                               | 916                  | 96%         | 914                 | 96%         |
| 1                               | 26                   | 3%          | 30                  | 3%          |
| 2                               | 13                   | 1%          | 3                   | 0%          |
| 3                               | 1                    | 0%          | 1                   | 0%          |
| 4                               | 0                    | 0%          | 0                   | 0%          |
| 5                               | 0                    | 0%          | 0                   | 0%          |
| <i>Missing</i>                  | 4                    | <i>n/a</i>  | 0                   | <i>n/a</i>  |
| <b>Total</b>                    | <b>960</b>           | <b>100%</b> | <b>948</b>          | <b>100%</b> |

Table S16: Worst general disorder grade within each category ever (by treatment arm) – Part 1

|                                    | A<br>SOC-only |             | G<br>SOC+AAP |             |
|------------------------------------|---------------|-------------|--------------|-------------|
|                                    | N             | %           | N            | %           |
| <b>Fever</b>                       |               |             |              |             |
| 0                                  | 932           | 97%         | 907          | 96%         |
| 1                                  | 22            | 2%          | 30           | 3%          |
| 2                                  | 2             | 0%          | 9            | 1%          |
| 3                                  | 2             | 0%          | 2            | 0%          |
| 4                                  | 0             | 0%          | 0            | 0%          |
| 5                                  | 0             | 0%          | 0            | 0%          |
| Missing                            | 2             | n/a         | 0            | n/a         |
| <b>Flu-like symptoms (G1-3)</b>    |               |             |              |             |
| 0                                  | 901           | 94%         | 844          | 89%         |
| 1                                  | 49            | 5%          | 90           | 9%          |
| 2                                  | 8             | 1%          | 12           | 1%          |
| 3                                  | 0             | 0%          | 2            | 0%          |
| 4                                  | 0             | 0%          | 0            | 0%          |
| 5                                  | 0             | 0%          | 0            | 0%          |
| Missing                            | 2             | n/a         | 0            | n/a         |
| <b>Oral candidiasis (CTCAE V3)</b> |               |             |              |             |
| 0                                  | 953           | 99%         | 927          | 98%         |
| 1                                  | 4             | 0%          | 11           | 1%          |
| 2                                  | 1             | 0%          | 9            | 1%          |
| 3                                  | 0             | 0%          | 1            | 0%          |
| 4                                  | 0             | 0%          | 0            | 0%          |
| 5                                  | 0             | 0%          | 0            | 0%          |
| Missing                            | 2             | n/a         | 0            | n/a         |
| <b>Fatigue (G1-3)</b>              |               |             |              |             |
| 0                                  | 408           | 43%         | 300          | 32%         |
| 1                                  | 400           | 42%         | 424          | 45%         |
| 2                                  | 136           | 14%         | 203          | 21%         |
| 3                                  | 15            | 2%          | 21           | 2%          |
| 4                                  | 0             | 0%          | 0            | 0%          |
| 5                                  | 0             | 0%          | 0            | 0%          |
| Missing                            | 1             | n/a         | 0            | n/a         |
| <b>Falls (G1-3)</b>                |               |             |              |             |
| 0                                  | 331           | 100%        | 459          | 100%        |
| 1                                  | 0             | 0%          | 0            | 0%          |
| 2                                  | 0             | 0%          | 0            | 0%          |
| 3                                  | 0             | 0%          | 0            | 0%          |
| 4                                  | 0             | 0%          | 0            | 0%          |
| 5                                  | 0             | 0%          | 0            | 0%          |
| Missing                            | 629           | n/a         | 489          | n/a         |
| <b>Total</b>                       | <b>960</b>    | <b>100%</b> | <b>948</b>   | <b>100%</b> |

Table S17: Worst general disorder grade within each category ever (by treatment arm) – Part 2

|                               |         | A          |             | G          |             |
|-------------------------------|---------|------------|-------------|------------|-------------|
|                               |         | SOC-only   |             | SOC+AAP    |             |
|                               |         | N          | %           | N          | %           |
| <b>Oedema (G1-3)</b>          | 0       | 812        | 85%         | 738        | 78%         |
|                               | 1       | 134        | 14%         | 176        | 19%         |
|                               | 2       | 12         | 1%          | 29         | 3%          |
|                               | 3       | 0          | 0%          | 5          | 1%          |
|                               | 4       | 0          | 0%          | 0          | 0%          |
|                               | 5       | 0          | 0%          | 0          | 0%          |
|                               | Missing | 2          | n/a         | 0          | n/a         |
| <b>Other general disorder</b> | 0       | 881        | 92%         | 823        | 87%         |
|                               | 1       | 51         | 5%          | 71         | 7%          |
|                               | 2       | 13         | 1%          | 32         | 3%          |
|                               | 3       | 6          | 1%          | 13         | 1%          |
|                               | 4       | 7          | 1%          | 8          | 1%          |
|                               | 5       | 0          | 0%          | 1          | 0%          |
|                               | Missing | 2          | n/a         | 0          | n/a         |
| <b>Total</b>                  |         | <b>960</b> | <b>100%</b> | <b>948</b> | <b>100%</b> |

Table S18: Worst hepatic disorder grade within each category ever (by treatment arm) – Part 1

|                                             | A<br>SOC-only |             | G<br>SOC+AAP |             |
|---------------------------------------------|---------------|-------------|--------------|-------------|
|                                             | N             | %           | N            | %           |
| <b>Abnormal hepatic function (CTCAE V3)</b> |               |             |              |             |
| 0                                           | 902           | 95%         | 835          | 88%         |
| 1                                           | 42            | 4%          | 75           | 8%          |
| 2                                           | 7             | 1%          | 21           | 2%          |
| 3                                           | 2             | 0%          | 15           | 2%          |
| 4                                           | 1             | 0%          | 2            | 0%          |
| 5                                           | 0             | 0%          | 0            | 0%          |
| Missing                                     | 6             | n/a         | 0            | n/a         |
| <b>Bilirubin increase (G1-4)</b>            |               |             |              |             |
| 0                                           | 952           | 100%        | 939          | 99%         |
| 1                                           | 0             | 0%          | 0            | 0%          |
| 2                                           | 0             | 0%          | 0            | 0%          |
| 3                                           | 2             | 0%          | 9            | 1%          |
| 4                                           | 0             | 0%          | 0            | 0%          |
| 5                                           | 0             | 0%          | 0            | 0%          |
| Missing                                     | 6             | n/a         | 0            | n/a         |
| <b>Increased AST (G1-4)</b>                 |               |             |              |             |
| 0                                           | 924           | 97%         | 879          | 93%         |
| 1                                           | 26            | 3%          | 45           | 5%          |
| 2                                           | 1             | 0%          | 14           | 1%          |
| 3                                           | 2             | 0%          | 9            | 1%          |
| 4                                           | 0             | 0%          | 1            | 0%          |
| 5                                           | 0             | 0%          | 0            | 0%          |
| Missing                                     | 7             | n/a         | 0            | n/a         |
| <b>Increased ALT (G1-4)</b>                 |               |             |              |             |
| 0                                           | 828           | 87%         | 710          | 75%         |
| 1                                           | 112           | 12%         | 142          | 15%         |
| 2                                           | 10            | 1%          | 43           | 5%          |
| 3                                           | 4             | 0%          | 50           | 5%          |
| 4                                           | 0             | 0%          | 3            | 0%          |
| 5                                           | 0             | 0%          | 0            | 0%          |
| Missing                                     | 6             | n/a         | 0            | n/a         |
| <b>Hypoalbuminaemia</b>                     |               |             |              |             |
| 0                                           | 331           | 100%        | 459          | 100%        |
| 1                                           | 0             | 0%          | 0            | 0%          |
| 2                                           | 0             | 0%          | 0            | 0%          |
| 3                                           | 0             | 0%          | 0            | 0%          |
| 4                                           | 0             | 0%          | 0            | 0%          |
| 5                                           | 0             | 0%          | 0            | 0%          |
| Missing                                     | 629           | n/a         | 489          | n/a         |
| <b>Total</b>                                | <b>960</b>    | <b>100%</b> | <b>948</b>   | <b>100%</b> |



**Table S19: Worst hepatic disorder grade within each category ever (by treatment arm) – Part 2**

|                               |         | A          |             | G          |             |
|-------------------------------|---------|------------|-------------|------------|-------------|
|                               |         | SOC-only   |             | SOC+AAP    |             |
|                               |         | N          | %           | N          | %           |
| <b>Other hepatic disorder</b> | 0       | 927        | 97%         | 901        | 95%         |
|                               | 1       | 21         | 2%          | 38         | 4%          |
|                               | 2       | 4          | 0%          | 5          | 1%          |
|                               | 3       | 2          | 0%          | 4          | 0%          |
|                               | 4       | 0          | 0%          | 0          | 0%          |
|                               | 5       | 0          | 0%          | 0          | 0%          |
|                               | Missing | 6          | n/a         | 0          | n/a         |
| <b>Total</b>                  |         | <b>960</b> | <b>100%</b> | <b>948</b> | <b>100%</b> |

Table S20: Worst lab abnormalities grade within each category ever (by treatment arm)

|                                         |         | A          |             | G          |             |
|-----------------------------------------|---------|------------|-------------|------------|-------------|
|                                         |         | SOC-only   |             | SOC+AAP    |             |
|                                         |         | N          | %           | N          | %           |
| <b>Hypocalcaemia</b>                    | 0       | 925        | 97%         | 892        | 94%         |
|                                         | 1       | 27         | 3%          | 54         | 6%          |
|                                         | 2       | 2          | 0%          | 2          | 0%          |
|                                         | 3       | 0          | 0%          | 0          | 0%          |
|                                         | 4       | 0          | 0%          | 0          | 0%          |
|                                         | 5       | 0          | 0%          | 0          | 0%          |
|                                         | Missing | 6          | n/a         | 0          | n/a         |
| <b>Hypokalaemia</b>                     | 0       | 932        | 98%         | 832        | 88%         |
|                                         | 1       | 19         | 2%          | 104        | 11%         |
|                                         | 2       | 2          | 0%          | 11         | 1%          |
|                                         | 3       | 0          | 0%          | 0          | 0%          |
|                                         | 4       | 1          | 0%          | 1          | 0%          |
|                                         | 5       | 0          | 0%          | 0          | 0%          |
|                                         | Missing | 6          | n/a         | 0          | n/a         |
| <b>Elevated ALP (G1-4)</b>              | 0       | 331        | 100%        | 459        | 100%        |
|                                         | 1       | 0          | 0%          | 0          | 0%          |
|                                         | 2       | 0          | 0%          | 0          | 0%          |
|                                         | 3       | 0          | 0%          | 0          | 0%          |
|                                         | 4       | 0          | 0%          | 0          | 0%          |
|                                         | 5       | 0          | 0%          | 0          | 0%          |
|                                         | Missing | 629        | n/a         | 489        | n/a         |
| <b>Hypophosphataemia<br/>(CTCAE V3)</b> | 0       | 937        | 98%         | 903        | 95%         |
|                                         | 1       | 14         | 1%          | 31         | 3%          |
|                                         | 2       | 3          | 0%          | 13         | 1%          |
|                                         | 3       | 0          | 0%          | 0          | 0%          |
|                                         | 4       | 0          | 0%          | 1          | 0%          |
|                                         | 5       | 0          | 0%          | 0          | 0%          |
|                                         | Missing | 6          | n/a         | 0          | n/a         |
| <b>Other lab abnormalities</b>          | 0       | 650        | 68%         | 546        | 58%         |
|                                         | 1       | 253        | 27%         | 331        | 35%         |
|                                         | 2       | 33         | 3%          | 50         | 5%          |
|                                         | 3       | 17         | 2%          | 19         | 2%          |
|                                         | 4       | 1          | 0%          | 2          | 0%          |
|                                         | 5       | 0          | 0%          | 0          | 0%          |
|                                         | Missing | 6          | n/a         | 0          | n/a         |
| <b>Total</b>                            |         | <b>960</b> | <b>100%</b> | <b>948</b> | <b>100%</b> |

Table S21: Worst metabolic & nutritional grade within each category ever (by treatment arm)

|                                          | A<br>SOC-only |             | G<br>SOC+only |             |
|------------------------------------------|---------------|-------------|---------------|-------------|
|                                          | N             | %           | N             | %           |
| <b>Anorexia</b>                          |               |             |               |             |
| 0                                        | 895           | 93%         | 860           | 91%         |
| 1                                        | 54            | 6%          | 72            | 8%          |
| 2                                        | 7             | 1%          | 13            | 1%          |
| 3                                        | 3             | 0%          | 3             | 0%          |
| 4                                        | 0             | 0%          | 0             | 0%          |
| 5                                        | 0             | 0%          | 0             | 0%          |
| Missing                                  | 1             | n/a         | 0             | n/a         |
| <b>Weight gain (G1-3)</b>                |               |             |               |             |
| 0                                        | 331           | 100%        | 459           | 100%        |
| 1                                        | 0             | 0%          | 0             | 0%          |
| 2                                        | 0             | 0%          | 0             | 0%          |
| 3                                        | 0             | 0%          | 0             | 0%          |
| 4                                        | 0             | 0%          | 0             | 0%          |
| 5                                        | 0             | 0%          | 0             | 0%          |
| Missing                                  | 629           | n/a         | 489           | n/a         |
| <b>High cholesterol (G1-4)</b>           |               |             |               |             |
| 0                                        | 331           | 100%        | 459           | 100%        |
| 1                                        | 0             | 0%          | 0             | 0%          |
| 2                                        | 0             | 0%          | 0             | 0%          |
| 3                                        | 0             | 0%          | 0             | 0%          |
| 4                                        | 0             | 0%          | 0             | 0%          |
| 5                                        | 0             | 0%          | 0             | 0%          |
| Missing                                  | 629           | n/a         | 489           | n/a         |
| <b>Hypertriglyceridaemia</b>             |               |             |               |             |
| 0                                        | 331           | 100%        | 459           | 100%        |
| 1                                        | 0             | 0%          | 0             | 0%          |
| 2                                        | 0             | 0%          | 0             | 0%          |
| 3                                        | 0             | 0%          | 0             | 0%          |
| 4                                        | 0             | 0%          | 0             | 0%          |
| 5                                        | 0             | 0%          | 0             | 0%          |
| Missing                                  | 629           | n/a         | 489           | n/a         |
| <b>Other metabolic &amp; nutritional</b> |               |             |               |             |
| 0                                        | 853           | 89%         | 852           | 90%         |
| 1                                        | 98            | 10%         | 83            | 9%          |
| 2                                        | 7             | 1%          | 11            | 1%          |
| 3                                        | 1             | 0%          | 2             | 0%          |
| 4                                        | 0             | 0%          | 0             | 0%          |
| 5                                        | 0             | 0%          | 0             | 0%          |
| Missing                                  | 1             | n/a         | 0             | n/a         |
| <b>Total</b>                             | <b>960</b>    | <b>100%</b> | <b>948</b>    | <b>100%</b> |

Table S22: Worst musculoskeletal disorder grade within each category ever (by treatment arm) – Part 1

|                                      |         | A          |             | G          |             |
|--------------------------------------|---------|------------|-------------|------------|-------------|
|                                      |         | SOC-only   |             | SOC+AAP    |             |
|                                      |         | N          | %           | N          | %           |
| <b>Backpain (G1-3)</b>               |         |            |             |            |             |
|                                      | 0       | 331        | 100%        | 458        | 100%        |
|                                      | 1       | 0          | 0%          | 0          | 0%          |
|                                      | 2       | 0          | 0%          | 0          | 0%          |
|                                      | 3       | 0          | 0%          | 0          | 0%          |
|                                      | 4       | 0          | 0%          | 0          | 0%          |
|                                      | 5       | 0          | 0%          | 0          | 0%          |
|                                      | Missing | 629        | n/a         | 489        | n/a         |
| <b>Muscle pain (Myalgia; G1-3)</b>   |         |            |             |            |             |
|                                      | 0       | 825        | 86%         | 806        | 85%         |
|                                      | 1       | 107        | 11%         | 116        | 12%         |
|                                      | 2       | 26         | 3%          | 23         | 2%          |
|                                      | 3       | 0          | 0%          | 3          | 0%          |
|                                      | 4       | 0          | 0%          | 0          | 0%          |
|                                      | 5       | 0          | 0%          | 0          | 0%          |
|                                      | Missing | 2          | n/a         | 0          | n/a         |
| <b>Joint pain (Arthralgia; G1-3)</b> |         |            |             |            |             |
|                                      | 0       | 746        | 78%         | 717        | 76%         |
|                                      | 1       | 161        | 17%         | 171        | 18%         |
|                                      | 2       | 46         | 5%          | 48         | 5%          |
|                                      | 3       | 5          | 1%          | 12         | 1%          |
|                                      | 4       | 0          | 0%          | 0          | 0%          |
|                                      | 5       | 0          | 0%          | 0          | 0%          |
|                                      | Missing | 2          | n/a         | 0          | n/a         |
| <b>Other bone pain (G1-3)</b>        |         |            |             |            |             |
|                                      | 0       | 663        | 69%         | 675        | 71%         |
|                                      | 1       | 200        | 21%         | 171        | 18%         |
|                                      | 2       | 74         | 8%          | 81         | 9%          |
|                                      | 3       | 21         | 2%          | 21         | 2%          |
|                                      | 4       | 0          | 0%          | 0          | 0%          |
|                                      | 5       | 0          | 0%          | 0          | 0%          |
|                                      | Missing | 2          | n/a         | 0          | n/a         |
| <b>Osteoporosis (G1-3)</b>           |         |            |             |            |             |
|                                      | 0       | 331        | 100%        | 458        | 100%        |
|                                      | 1       | 0          | 0%          | 0          | 0%          |
|                                      | 2       | 0          | 0%          | 0          | 0%          |
|                                      | 3       | 0          | 0%          | 0          | 0%          |
|                                      | 4       | 0          | 0%          | 0          | 0%          |
|                                      | 5       | 0          | 0%          | 0          | 0%          |
|                                      | Missing | 629        | n/a         | 489        | n/a         |
| <b>Total</b>                         |         | <b>960</b> | <b>100%</b> | <b>948</b> | <b>100%</b> |

Table S23: Worst musculoskeletal disorder grade within each category ever (by treatment arm) – Part 2

|                                       |         | A          |             | G          |             |
|---------------------------------------|---------|------------|-------------|------------|-------------|
|                                       |         | SOC-only   |             | SOC+AAP    |             |
|                                       |         | N          | %           | N          | %           |
| <b>Fracture</b>                       | 0       | 331        | 100%        | 458        | 100%        |
|                                       | 1       | 0          | 0%          | 0          | 0%          |
|                                       | 2       | 0          | 0%          | 0          | 0%          |
|                                       | 3       | 0          | 0%          | 0          | 0%          |
|                                       | 4       | 0          | 0%          | 0          | 0%          |
|                                       | 5       | 0          | 0%          | 0          | 0%          |
|                                       | Missing | 629        | n/a         | 489        | n/a         |
| <b>Generalised pain (G1-3)</b>        | 0       | 672        | 70%         | 627        | 66%         |
|                                       | 1       | 226        | 24%         | 244        | 26%         |
|                                       | 2       | 54         | 6%          | 67         | 7%          |
|                                       | 3       | 6          | 1%          | 10         | 1%          |
|                                       | 4       | 0          | 0%          | 0          | 0%          |
|                                       | 5       | 0          | 0%          | 0          | 0%          |
|                                       | Missing | 2          | n/a         | 0          | n/a         |
| <b>Other musculoskeletal disorder</b> | 0       | 604        | 63%         | 542        | 57%         |
|                                       | 1       | 248        | 26%         | 249        | 26%         |
|                                       | 2       | 86         | 9%          | 118        | 12%         |
|                                       | 3       | 18         | 2%          | 39         | 4%          |
|                                       | 4       | 2          | 0%          | 0          | 0%          |
|                                       | 5       | 0          | 0%          | 0          | 0%          |
|                                       | Missing | 2          | n/a         | 0          | n/a         |
| <b>Total</b>                          |         | <b>960</b> | <b>100%</b> | <b>948</b> | <b>100%</b> |

Table S24: Worst nervous system grade within each category ever (by treatment arm)

|                                     |         | A          |             | G          |             |
|-------------------------------------|---------|------------|-------------|------------|-------------|
|                                     |         | SOC-only   |             | SOC+AAP    |             |
|                                     |         | N          | %           | N          | %           |
| <b>Dizziness (G1-3)</b>             |         |            |             |            |             |
|                                     | 0       | 854        | 89%         | 786        | 83%         |
|                                     | 1       | 91         | 9%          | 132        | 14%         |
|                                     | 2       | 13         | 1%          | 27         | 3%          |
|                                     | 3       | 0          | 0%          | 3          | 0%          |
|                                     | 4       | 0          | 0%          | 0          | 0%          |
|                                     | 5       | 0          | 0%          | 0          | 0%          |
|                                     | Missing | 2          | n/a         | 0          | n/a         |
| <b>Headache (G1-3)</b>              |         |            |             |            |             |
|                                     | 0       | 849        | 89%         | 782        | 82%         |
|                                     | 1       | 99         | 10%         | 137        | 14%         |
|                                     | 2       | 9          | 1%          | 24         | 3%          |
|                                     | 3       | 1          | 0%          | 5          | 1%          |
|                                     | 4       | 0          | 0%          | 0          | 0%          |
|                                     | 5       | 0          | 0%          | 0          | 0%          |
|                                     | Missing | 2          | n/a         | 0          | n/a         |
| <b>Seizure</b>                      |         |            |             |            |             |
|                                     | 0       | 951        | 100%        | 944        | 100%        |
|                                     | 1       | 0          | 0%          | 0          | 0%          |
|                                     | 2       | 3          | 0%          | 3          | 0%          |
|                                     | 3       | 0          | 0%          | 0          | 0%          |
|                                     | 4       | 0          | 0%          | 1          | 0%          |
|                                     | 5       | 0          | 0%          | 0          | 0%          |
|                                     | Missing | 6          | n/a         | 0          | n/a         |
| <b>Cognitive disturbance (G1-3)</b> |         |            |             |            |             |
|                                     | 0       | 918        | 96%         | 887        | 94%         |
|                                     | 1       | 28         | 3%          | 44         | 5%          |
|                                     | 2       | 6          | 1%          | 13         | 1%          |
|                                     | 3       | 2          | 0%          | 4          | 0%          |
|                                     | 4       | 0          | 0%          | 0          | 0%          |
|                                     | 5       | 0          | 0%          | 0          | 0%          |
|                                     | Missing | 6          | n/a         | 0          | n/a         |
| <b>Other nervous system</b>         |         |            |             |            |             |
|                                     | 0       | 865        | 90%         | 814        | 86%         |
|                                     | 1       | 60         | 6%          | 86         | 9%          |
|                                     | 2       | 17         | 2%          | 27         | 3%          |
|                                     | 3       | 13         | 1%          | 15         | 2%          |
|                                     | 4       | 3          | 0%          | 4          | 0%          |
|                                     | 5       | 0          | 0%          | 2          | 0%          |
|                                     | Missing | 2          | n/a         | 0          | n/a         |
| <b>Total</b>                        |         | <b>960</b> | <b>100%</b> | <b>948</b> | <b>100%</b> |

Table S25: Worst ocular disorder grade within each category ever (by treatment arm)

|                                        | A<br>SOC-only |             | G<br>SOC+AAP |             |
|----------------------------------------|---------------|-------------|--------------|-------------|
|                                        | N             | %           | N            | %           |
| <b>Blurred vision (G1-3)</b>           |               |             |              |             |
| 0                                      | 924           | 96%         | 893          | 94%         |
| 1                                      | 31            | 3%          | 49           | 5%          |
| 2                                      | 2             | 0%          | 3            | 0%          |
| 3                                      | 1             | 0%          | 3            | 0%          |
| 4                                      | 0             | 0%          | 0            | 0%          |
| 5                                      | 0             | 0%          | 0            | 0%          |
| Missing                                | 2             | n/a         | 0            | n/a         |
| <b>Cataracts (G1-4)</b>                |               |             |              |             |
| 0                                      | 331           | 100%        | 459          | 100%        |
| 1                                      | 0             | 0%          | 0            | 0%          |
| 2                                      | 0             | 0%          | 0            | 0%          |
| 3                                      | 0             | 0%          | 0            | 0%          |
| 4                                      | 0             | 0%          | 0            | 0%          |
| 5                                      | 0             | 0%          | 0            | 0%          |
| Missing                                | 629           | n/a         | 489          | n/a         |
| <b>Conjunctivitis (CTCAE V3; G1-3)</b> |               |             |              |             |
| 0                                      | 952           | 99%         | 941          | 99%         |
| 1                                      | 5             | 1%          | 5            | 1%          |
| 2                                      | 1             | 0%          | 1            | 0%          |
| 3                                      | 0             | 0%          | 1            | 0%          |
| 4                                      | 0             | 0%          | 0            | 0%          |
| 5                                      | 0             | 0%          | 0            | 0%          |
| Missing                                | 2             | n/a         | 0            | n/a         |
| <b>Other ocular disorder</b>           |               |             |              |             |
| 0                                      | 906           | 95%         | 859          | 91%         |
| 1                                      | 42            | 4%          | 68           | 7%          |
| 2                                      | 6             | 1%          | 7            | 1%          |
| 3                                      | 4             | 0%          | 14           | 1%          |
| 4                                      | 0             | 0%          | 0            | 0%          |
| 5                                      | 0             | 0%          | 0            | 0%          |
| Missing                                | 2             | n/a         | 0            | n/a         |
| <b>Total</b>                           | <b>960</b>    | <b>100%</b> | <b>948</b>   | <b>100%</b> |

Table S26: Worst psychiatric disorder grade within each category ever (by treatment arm)

|                                   | A<br>SOC-only |             | G<br>SOC+AAP |             |
|-----------------------------------|---------------|-------------|--------------|-------------|
|                                   | N             | %           | N            | %           |
| <b>Insomnia (G1-3)</b>            |               |             |              |             |
| 0                                 | 720           | 75%         | 651          | 69%         |
| 1                                 | 180           | 19%         | 222          | 23%         |
| 2                                 | 52            | 5%          | 61           | 6%          |
| 3                                 | 6             | 1%          | 14           | 1%          |
| 4                                 | 0             | 0%          | 0            | 0%          |
| 5                                 | 0             | 0%          | 0            | 0%          |
| Missing                           | 2             | n/a         | 0            | n/a         |
| <b>Depression</b>                 |               |             |              |             |
| 0                                 | 331           | 100%        | 459          | 100%        |
| 1                                 | 0             | 0%          | 0            | 0%          |
| 2                                 | 0             | 0%          | 0            | 0%          |
| 3                                 | 0             | 0%          | 0            | 0%          |
| 4                                 | 0             | 0%          | 0            | 0%          |
| 5                                 | 0             | 0%          | 0            | 0%          |
| Missing                           | 629           | n/a         | 489          | n/a         |
| <b>Anxiety</b>                    |               |             |              |             |
| 0                                 | 331           | 100%        | 459          | 100%        |
| 1                                 | 0             | 0%          | 0            | 0%          |
| 2                                 | 0             | 0%          | 0            | 0%          |
| 3                                 | 0             | 0%          | 0            | 0%          |
| 4                                 | 0             | 0%          | 0            | 0%          |
| 5                                 | 0             | 0%          | 0            | 0%          |
| Missing                           | 629           | n/a         | 489          | n/a         |
| <b>Other psychiatric disorder</b> |               |             |              |             |
| 0                                 | 782           | 82%         | 716          | 76%         |
| 1                                 | 145           | 15%         | 166          | 18%         |
| 2                                 | 26            | 3%          | 56           | 6%          |
| 3                                 | 5             | 1%          | 9            | 1%          |
| 4                                 | 0             | 0%          | 1            | 0%          |
| 5                                 | 0             | 0%          | 0            | 0%          |
| Missing                           | 2             | n/a         | 0            | n/a         |
| <b>Total</b>                      | <b>960</b>    | <b>100%</b> | <b>948</b>   | <b>100%</b> |



Table S27: Worst renal disorder grade within each category ever (by treatment arm) – Part 1

|                                       |         | A          |             | G          |             |
|---------------------------------------|---------|------------|-------------|------------|-------------|
|                                       |         | SOC-only   |             | SOC+AAP    |             |
|                                       |         | N          | %           | N          | %           |
| <b>Acute kidney injury</b>            | 0       | 953        | 99%         | 941        | 99%         |
|                                       | 1       | 1          | 0%          | 2          | 0%          |
|                                       | 2       | 0          | 0%          | 1          | 0%          |
|                                       | 3       | 4          | 0%          | 2          | 0%          |
|                                       | 4       | 1          | 0%          | 2          | 0%          |
|                                       | 5       | 0          | 0%          | 0          | 0%          |
|                                       | Missing | 1          | n/a         | 0          | n/a         |
| <b>Haematuria</b>                     | 0       | 905        | 94%         | 875        | 92%         |
|                                       | 1       | 37         | 4%          | 53         | 6%          |
|                                       | 2       | 13         | 1%          | 16         | 2%          |
|                                       | 3       | 3          | 0%          | 2          | 0%          |
|                                       | 4       | 0          | 0%          | 2          | 0%          |
|                                       | 5       | 0          | 0%          | 0          | 0%          |
|                                       | Missing | 2          | n/a         | 0          | n/a         |
| <b>Chronic kidney disease</b>         | 0       | 868        | 91%         | 859        | 91%         |
|                                       | 1       | 73         | 8%          | 73         | 8%          |
|                                       | 2       | 13         | 1%          | 12         | 1%          |
|                                       | 3       | 5          | 1%          | 4          | 0%          |
|                                       | 4       | 0          | 0%          | 0          | 0%          |
|                                       | 5       | 0          | 0%          | 0          | 0%          |
|                                       | Missing | 1          | n/a         | 0          | n/a         |
| <b>Urinary tract infection (G2-5)</b> | 0       | 883        | 92%         | 866        | 91%         |
|                                       | 1       | 0          | 0%          | 0          | 0%          |
|                                       | 2       | 68         | 7%          | 71         | 7%          |
|                                       | 3       | 7          | 1%          | 9          | 1%          |
|                                       | 4       | 0          | 0%          | 2          | 0%          |
|                                       | 5       | 0          | 0%          | 0          | 0%          |
|                                       | Missing | 2          | n/a         | 0          | n/a         |
| <b>Urinary frequency (G1-2)</b>       | 0       | 367        | 38%         | 340        | 36%         |
|                                       | 1       | 386        | 40%         | 394        | 42%         |
|                                       | 2       | 205        | 21%         | 214        | 23%         |
|                                       | 3       | 0          | 0%          | 0          | 0%          |
|                                       | 4       | 0          | 0%          | 0          | 0%          |
|                                       | 5       | 0          | 0%          | 0          | 0%          |
|                                       | Missing | 2          | n/a         | 0          | n/a         |
| <b>Total</b>                          |         | <b>960</b> | <b>100%</b> | <b>948</b> | <b>100%</b> |

Table S28: Worst renal disorder grade within each category ever (by treatment arm) – Part 2

|                                  |         | A          |             | G          |             |
|----------------------------------|---------|------------|-------------|------------|-------------|
|                                  |         | SOC-only   |             | SOC+AAP    |             |
|                                  |         | N          | %           | N          | %           |
| <b>Urinary urgency (G1-2)</b>    | 0       | 331        | 100%        | 459        | 100%        |
|                                  | 1       | 0          | 0%          | 0          | 0%          |
|                                  | 2       | 0          | 0%          | 0          | 0%          |
|                                  | 3       | 0          | 0%          | 0          | 0%          |
|                                  | 4       | 0          | 0%          | 0          | 0%          |
|                                  | 5       | 0          | 0%          | 0          | 0%          |
|                                  | Missing | 629        | n/a         | 489        | n/a         |
| <b>Urinary tract obstruction</b> | 0       | 331        | 100%        | 459        | 100%        |
|                                  | 1       | 0          | 0%          | 0          | 0%          |
|                                  | 2       | 0          | 0%          | 0          | 0%          |
|                                  | 3       | 0          | 0%          | 1          | 0%          |
|                                  | 4       | 0          | 0%          | 0          | 0%          |
|                                  | 5       | 0          | 0%          | 0          | 0%          |
|                                  | Missing | 629        | n/a         | 489        | n/a         |
| <b>Other renal disorder</b>      | 0       | 739        | 78%         | 765        | 81%         |
|                                  | 1       | 137        | 15%         | 112        | 12%         |
|                                  | 2       | 50         | 5%          | 47         | 5%          |
|                                  | 3       | 16         | 2%          | 21         | 2%          |
|                                  | 4       | 2          | 0%          | 0          | 0%          |
|                                  | 5       | 0          | 0%          | 0          | 0%          |
|                                  | Missing | 16         | n/a         | 3          | n/a         |
| <b>Total</b>                     |         | <b>960</b> | <b>100%</b> | <b>948</b> | <b>100%</b> |

Table S29: Worst respiratory disorder grade within each category ever (by treatment arm) – Part 1

|                                                 |                | A          |             | G          |             |
|-------------------------------------------------|----------------|------------|-------------|------------|-------------|
|                                                 |                | SOC-only   |             | SOC+AAP    |             |
|                                                 |                | N          | %           | N          | %           |
| <b>Cough (G1-3)</b>                             |                |            |             |            |             |
|                                                 | 0              | 826        | 86%         | 693        | 73%         |
|                                                 | 1              | 122        | 13%         | 216        | 23%         |
|                                                 | 2              | 10         | 1%          | 34         | 4%          |
|                                                 | <b>3</b>       | <b>0</b>   | <b>0%</b>   | <b>5</b>   | <b>1%</b>   |
|                                                 | <b>4</b>       | <b>0</b>   | <b>0%</b>   | <b>0</b>   | <b>0%</b>   |
|                                                 | <b>5</b>       | <b>0</b>   | <b>0%</b>   | <b>0</b>   | <b>0%</b>   |
|                                                 | <i>Missing</i> | 2          | <i>n/a</i>  | 0          | <i>n/a</i>  |
| <b>Breathlessness (Dyspnoea)</b>                |                |            |             |            |             |
|                                                 | 0              | 780        | 81%         | 693        | 73%         |
|                                                 | 1              | 136        | 14%         | 190        | 20%         |
|                                                 | 2              | 35         | 4%          | 47         | 5%          |
|                                                 | <b>3</b>       | <b>7</b>   | <b>1%</b>   | <b>15</b>  | <b>2%</b>   |
|                                                 | <b>4</b>       | <b>0</b>   | <b>0%</b>   | <b>2</b>   | <b>0%</b>   |
|                                                 | <b>5</b>       | <b>0</b>   | <b>0%</b>   | <b>1</b>   | <b>0%</b>   |
|                                                 | <i>Missing</i> | 2          | <i>n/a</i>  | 0          | <i>n/a</i>  |
| <b>Allergic rhinitis (G1-2)</b>                 |                |            |             |            |             |
|                                                 | 0              | 921        | 96%         | 878        | 93%         |
|                                                 | 1              | 35         | 4%          | 66         | 7%          |
|                                                 | 2              | 2          | 0%          | 4          | 0%          |
|                                                 | <b>3</b>       | <b>0</b>   | <b>0%</b>   | <b>0</b>   | <b>0%</b>   |
|                                                 | <b>4</b>       | <b>0</b>   | <b>0%</b>   | <b>0</b>   | <b>0%</b>   |
|                                                 | <b>5</b>       | <b>0</b>   | <b>0%</b>   | <b>0</b>   | <b>0%</b>   |
|                                                 | <i>Missing</i> | 2          | <i>n/a</i>  | 0          | <i>n/a</i>  |
| <b>Sinusitis (G2-5)</b>                         |                |            |             |            |             |
|                                                 | 0              | 936        | 98%         | 915        | 97%         |
|                                                 | 1              | 0          | 0%          | 0          | 0%          |
|                                                 | 2              | 22         | 2%          | 32         | 3%          |
|                                                 | <b>3</b>       | <b>0</b>   | <b>0%</b>   | <b>1</b>   | <b>0%</b>   |
|                                                 | <b>4</b>       | <b>0</b>   | <b>0%</b>   | <b>0</b>   | <b>0%</b>   |
|                                                 | <b>5</b>       | <b>0</b>   | <b>0%</b>   | <b>0</b>   | <b>0%</b>   |
|                                                 | <i>Missing</i> | 2          | <i>n/a</i>  | 0          | <i>n/a</i>  |
| <b>Upper respiratory tract infection (G2-5)</b> |                |            |             |            |             |
|                                                 | 0              | 871        | 91%         | 803        | 85%         |
|                                                 | 1              | 0          | 0%          | 0          | 0%          |
|                                                 | 2              | 85         | 9%          | 141        | 15%         |
|                                                 | <b>3</b>       | <b>2</b>   | <b>0%</b>   | <b>4</b>   | <b>0%</b>   |
|                                                 | <b>4</b>       | <b>0</b>   | <b>0%</b>   | <b>0</b>   | <b>0%</b>   |
|                                                 | <b>5</b>       | <b>0</b>   | <b>0%</b>   | <b>0</b>   | <b>0%</b>   |
|                                                 | <i>Missing</i> | 2          | <i>n/a</i>  | 0          | <i>n/a</i>  |
| <b>Total</b>                                    |                | <b>960</b> | <b>100%</b> | <b>948</b> | <b>100%</b> |

Table S30: Worst respiratory disorder grade within each category ever (by treatment arm) – Part 2

|                                                 |                | A          |             | G          |             |
|-------------------------------------------------|----------------|------------|-------------|------------|-------------|
|                                                 |                | SOC-only   |             | SOC+AAP    |             |
|                                                 |                | N          | %           | N          | %           |
| <b>Lower respiratory tract infection (G2-5)</b> |                |            |             |            |             |
|                                                 | 0              | 331        | 100%        | 456        | 99%         |
|                                                 | 1              | 0          | 0%          | 0          | 0%          |
|                                                 | 2              | 0          | 0%          | 1          | 0%          |
|                                                 | <b>3</b>       | <b>0</b>   | <b>0%</b>   | <b>1</b>   | <b>0%</b>   |
|                                                 | 4              | 0          | 0%          | 0          | 0%          |
|                                                 | 5              | 0          | 0%          | 1          | 0%          |
|                                                 | <i>Missing</i> | 629        | <i>n/a</i>  | 489        | <i>n/a</i>  |
| <b>Other respiratory disorder</b>               |                |            |             |            |             |
|                                                 | 0              | 890        | 93%         | 797        | 84%         |
|                                                 | 1              | 40         | 4%          | 78         | 8%          |
|                                                 | 2              | 14         | 1%          | 45         | 5%          |
|                                                 | <b>3</b>       | <b>11</b>  | <b>1%</b>   | <b>24</b>  | <b>3%</b>   |
|                                                 | 4              | 3          | 0%          | 1          | 0%          |
|                                                 | 5              | 1          | 0%          | 3          | 0%          |
|                                                 | <i>Missing</i> | 1          | <i>n/a</i>  | 0          | <i>n/a</i>  |
| <b>Total</b>                                    |                | <b>960</b> | <b>100%</b> | <b>948</b> | <b>100%</b> |

Table S31: Worst skin disorder grade within each category ever (by treatment arm)

|                                        |                | A          |             | G          |             |
|----------------------------------------|----------------|------------|-------------|------------|-------------|
|                                        |                | SOC-only   |             | SOC+only   |             |
|                                        |                | N          | %           | N          | %           |
| <b>Nail loss/discolouration (G1-2)</b> |                |            |             |            |             |
|                                        | 0              | 913        | 95%         | 887        | 94%         |
|                                        | 1              | 43         | 4%          | 55         | 6%          |
|                                        | 2              | 2          | 0%          | 6          | 1%          |
|                                        | <b>3</b>       | <b>0</b>   | <b>0%</b>   | <b>0</b>   | <b>0%</b>   |
|                                        | <b>4</b>       | <b>0</b>   | <b>0%</b>   | <b>0</b>   | <b>0%</b>   |
|                                        | <b>5</b>       | <b>0</b>   | <b>0%</b>   | <b>0</b>   | <b>0%</b>   |
|                                        | <i>Missing</i> | 2          | <i>n/a</i>  | 0          | <i>n/a</i>  |
| <b>Rash maculo-papular (G1-3)</b>      |                |            |             |            |             |
|                                        | 0              | 873        | 91%         | 813        | 86%         |
|                                        | 1              | 66         | 7%          | 103        | 11%         |
|                                        | 2              | 18         | 2%          | 30         | 3%          |
|                                        | <b>3</b>       | <b>1</b>   | <b>0%</b>   | <b>2</b>   | <b>0%</b>   |
|                                        | <b>4</b>       | <b>0</b>   | <b>0%</b>   | <b>0</b>   | <b>0%</b>   |
|                                        | <b>5</b>       | <b>0</b>   | <b>0%</b>   | <b>0</b>   | <b>0%</b>   |
|                                        | <i>Missing</i> | 2          | <i>n/a</i>  | 0          | <i>n/a</i>  |
| <b>Other skin disorder</b>             |                |            |             |            |             |
|                                        | 0              | 796        | 83%         | 715        | 75%         |
|                                        | 1              | 131        | 14%         | 178        | 19%         |
|                                        | 2              | 24         | 3%          | 40         | 4%          |
|                                        | <b>3</b>       | <b>7</b>   | <b>1%</b>   | <b>14</b>  | <b>1%</b>   |
|                                        | <b>4</b>       | <b>0</b>   | <b>0%</b>   | <b>1</b>   | <b>0%</b>   |
|                                        | <b>5</b>       | <b>0</b>   | <b>0%</b>   | <b>0</b>   | <b>0%</b>   |
|                                        | <i>Missing</i> | 2          | <i>n/a</i>  | 0          | <i>n/a</i>  |
| <b>Total</b>                           |                | <b>960</b> | <b>100%</b> | <b>948</b> | <b>100%</b> |

The following table provide a broad overview of worst toxicity reported over entire time on trial, by treatment received (safety population) within each subgroup of age at randomization, according to the dichotomous stratification factor used at randomization.

**Table S32: Worst Adverse Event Grade Reported Over Entire Time on Trial, by stratified age at randomisation**

|                                                       |                                  | Under 70  |            | 70 or over |           |
|-------------------------------------------------------|----------------------------------|-----------|------------|------------|-----------|
|                                                       |                                  | SOC-only  | SOC+AAP    | SOC-only   | SOC+AAP   |
| <b>Safety population</b>                              |                                  |           |            |            |           |
| Patients included in adverse event analysis           |                                  | 597       | 596        | 363        | 352       |
| Grade 1-5 AE                                          |                                  | 589 (99%) | 593 (100%) | 361 (99%)  | 350 (99%) |
| Grade 3-5 AE                                          |                                  | 189 (32%) | 274 (46%)  | 126 (35%)  | 169 (48%) |
| Grade 5 AE*                                           |                                  | 1         | 3          | 2          | 6         |
| Grade 3-5 AEs by toxicity category                    |                                  |           |            |            |           |
| Endocrine disorder (including hot flashes, impotence) |                                  | 80 (13%)  | 89 (15%)   | 53 (15%)   | 40 (11%)  |
| Cardiovascular disorder                               | including:                       | 20 (3%)   | 53 (9%)    | 21 (6%)    | 39 (11%)  |
|                                                       | <i>Hypertension</i>              | 8 (1%)    | 30 (5%)    | 5 (1%)     | 14 (4%)   |
|                                                       | <i>MI</i>                        | 3 (<1%)   | 4 (1%)     | 6 (2%)     | 6 (2%)    |
|                                                       | <i>Cardiac dysrhythmia</i>       | 1 (<1%)   | 8 (1%)     | 1 (<1%)    | 6 (2%)    |
| Musculoskeletal disorder                              |                                  | 31 (5%)   | 38 (6%)    | 15 (4%)    | 30 (9%)   |
| Gastrointestinal disorder                             |                                  | 18 (3%)   | 27 (5%)    | 22 (6%)    | 22 (6%)   |
| Hepatic disorder                                      | including:                       | 7 (1%)    | 51 (9%)    | 5 (1%)     | 19 (5%)   |
|                                                       | <i>Increased ALT</i>             | 3 (<1%)   | 39 (7%)    | 1 (<1%)    | 14 (4%)   |
|                                                       | <i>Increased AST</i>             | 1 (<1%)   | 9 (2%)     | 1 (<1%)    | 1 (<1%)   |
| General disorder                                      | including:                       | 14 (2%)   | 24 (4%)    | 15 (4%)    | 21 (6%)   |
|                                                       | <i>Fatigue</i>                   | 9 (2%)    | 9 (2%)     | 6 (2%)     | 12 (3%)   |
|                                                       | <i>Oedema</i>                    | 0 (0%)    | 4 (1%)     | 0 (0%)     | 1 (<1%)   |
| Respiratory disorder                                  | including:                       | 15 (3%)   | 21 (4%)    | 8 (2%)     | 23 (7%)   |
|                                                       | <i>Breathlessness (dyspnoea)</i> | 6 (1%)    | 9 (2%)     | 1 (<1%)    | 9 (3%)    |
| Lab abnormalities                                     | including:                       | 15 (3%)   | 18 (3%)    | 6 (2%)     | 16 (5%)   |
|                                                       | <i>Hypokalaemia</i>              | 3 (<1%)   | 6 (1%)     | 0 (0%)     | 6 (2%)    |

**Key:**

SOC = standard-of-care

AAP = abiraterone acetate + prednisolone
